# Supplementary material for: Distribution of Antibiotic Resistance in a Mixed-Use Watershed and the Impact of Wastewater Treatment Plants on Antibiotic Resistance in Surface Water
Source: Antibiotics (Basel). 2023 Nov 2;12(11):1586. doi: 10.3390/antibiotics12111586 (PMC10668835; doi:10.3390/antibiotics12111586)
Supplement: Supplementary file 1 [file antibiotics-12-01586-s001.zip › antibiotics-2660509-supplementary tables S1-S11.xlsx]

## Sheet: S1
Table S1. Masterfile for 2017 Fall Sampling
Sample site	Watershed/ WWTP	Environmental parameters					ESBL/ CRE				E. coli counts (CFU/ml)	E. coli		Salmonella		Enterococcus		antibiotic concentrations (ng/L)																										gene copies
		E. coli counts (CFU/ml)	temperature (°C)	pH	conductivity (µS/cm)	turbidity (NTU)	organism	AR phenotype	ESBL/CRE	β-lactamase gene		Presence	AR phenotype	Presence	AR phenotype (no. of isolates)	species	AR phenotype	Amo	Amp	Azi	Axo	Taz	Tio	Cip	Dap	Ery	Gen	Kan	Lin	Lnz	Mer	Met	Nal	Oxa	Pen	Smx	Sul	Str	Tig	Tri	Tet	Tyl	Van	bact16S_copies_uL	bact16S_copies_mL	ermB_copies_uL	ermB_copies_mL	ermB_ratio_to_16S	tetB_copies_uL
BICO 101	Oconee River	150	11.3	6.9	163.7	4.4					150	+	-	-	-	E. casseliflavus	Lin	2.296	5.488	0	0	0	0	0	0	0.504	0	0	0.432	0	0	0	0	0	0	11.512	0	0	0	4.264	0	5.608	0
MIDO 301	Bear Creek	250	11	6.86	53.3	1.7					250	+	-	+	Amo/ClaAmpFoxTioAxoChlGenStrSulTet (4)	E. casseliflavus	LinTet	0.756364	0	0	0	0	0.04	0	0	0.0618182	0	0	0	0	0	0	0	0	0	0	0	5.65818	0	0.261818	0	0	0	409714	33583.1	0	0	0	0
MIDO 601	McNutt Creek	100	10.9	6.8	70.8	2.3					100	+	-	+	Amo/ClaAmpFoxTioAxoChlGenStrSulTet (4)	E. faecalis	Lin	0	0	0	0	0	0.05	1.25	0	0	0	0	0	0	0	0	0	10.955	1	1.3	0	26.8	0	2.3	0	0	0
MIDO 604	McNutt Creek	150	11	6.85	70.2	3.7					150	+	-	+	Amo/ClaAmpFoxTioAxoChlGenStrSulTet (4)	E. casseliflavus	LinSyn	0	0	0.005	0	0	0	0	0	0.18	0	0	0	0	0	0	0	0	0	0	1.59	1.88	0	3.32	0	0	0	92899.7	10097.8	0	0	0	0
MIDO 608	McNutt Creek	150	10.9	6.81	68.6	2.2					150	+	-	+	Amo/ClaAmpFoxTioAxoChlGenStrSulTet (4)	E. faecalis	Lin	0	0	0	0	0	0	0.268	0	0	0	0	0	0	0	0	0	0	0	0	0	0	0	0.092	0	0	0	113500	10133.9	0	0	0	0
MIDO 609	McNutt Creek	400	11.5	6.78	63.2	2.1					400	+	-	-	-	E. casseliflavus	Lin	0.88	1.48	0	0	0	0.44	0.84	0	0	0	0	0	0	0	0	0	37.72	0	0.52	0.16	16.96	0	0.76	0	0	0	79338.2	7083.77	15.1534	1.35299	0.000190998	0
MIDO 610	McNutt Creek	100	10.9	6.77	70.9	3.9					100	+	-	-	-	E. faecalis	Lin	0.38	0	0	0	0	0	0.406667	0	0	0	0	0	0	0	0	0	0	1.00667	0.546667	0.406667	1.52	0	3.04667	0	0	0
MIDO 612	McNutt Creek	0	10.9	6.85	70.6	1.4					0	+	-	+	-	E. casseliflavus	Lin	0	0	0	0	0	0	0.473333	0	0	0	0	0	0	0	10.6533	0	0	0	0	0.366667	12.22	0	1.27333	0	0	0	9936.41	1380.06	0	0	0	0
MIDO 613	McNutt Creek	0	12	6.77	74.5	2					0	+	-	+	Amo/ClaAmpFoxTioAxoChlGenStrSulTet (1)	E. hirae	Lin	0	0	0	0	0	0	0	0	0	0	0	0	0	0	0	0	0	0	0.266667	0.88	0	0	0.773333	0	0	0
MIDO 616	McNutt Creek	400	11.1	6.72	91.9	2.9					400	+	-	+	-	E. casseliflavus	Lin	0	15.9086	0	0	0	0.417143	0	0	0	0	0	0	0	0	0	0	0	0	0	0	0	0	0.765714	0	0	0	201078	24521.7	12.0759	1.47267	6.00558e-05	0
MIDO 617	McNutt Creek	200	12.8	6.77	35.6	9.1					200	+	-	+	Amo/ClaAmpFoxTioAxoChlGenStrSulTet (3)	E. hirae	DapLin	5.94286	0	0	0	0	0.628571	3.31429	0	0	0	0	0	0	0	4.11429	0.457143	0	1.88571	0.628571	0.285714	25.6	0	0.4	0	0	0	27077	3302.07	0	0	0	0
MIDO 706	Calls Creek	50	10.5	6.89	50.5	6.4					50	+	-	+	-	E. casseliflavus	LinSyn	0	0	0	0	0	1.46667	11.3333	0	0.533333	0	0	0.8	37.7333	0	0	0	0	7.06667	0	5.06667	0	0	2.66667	0	0.666667	0	119775	28517.8	0	0	0	0
MIDO 707	Calls Creek	50	11.5	6.79	128.7	1					50	+	-	+	Amo/ClaAmpFoxTioAxoChlGenStrSulTet (2)	E. casseliflavus	CipLin	1.53778	1.97333	0.164444	0	0	0	0	0	0	0	0	0	0.946667	0.862222	0	0	0	0	3.85778	0	0	0	5.99111	0	0	0	36915.2	3619.13	0	0	0	0
MIDO 709	Calls Creek	1450	10.6	6.84	70.2	4.9					1450	+	-	+	-	E. faecalis	Lin	0	0	0	0	0	0.546667	1.02	0	0	0	0	0.293333	0	0	8.53333	0.166667	0	0	0	0	0	0	0.58	0	0	0	181175	25163.2	0	0	0	0
MIDO 712	Calls Creek	300	9.9	6.76	92.7	11					300	+	-	+	Amo/ClaAmpFoxTioAxoChlGenStrSulTet (2)	E. casseliflavus	Lin	0	0	0	0	0	0.0666667	1.6	0	0.266667	0	0	0.0666667	10.1333	0	0	0	21.8	0	2.73333	0	0	0	1.33333	0	2.53333	0	355762	49411.4	13.3426	1.85315	3.75044e-05	0
MIDO 719	Middle Oconee River	50	11.3	6.81	125.7	4.5					50	+	-	+	Amo/ClaAmpFoxTioAxoChlGenStrSulTet (1)	E. faecalis	Lin	0.05	0	0	0	10.9	0	2	0	0	0	0	0.05	0	0.35	0	0	0	0	2.65	0	0	0	1.9	0	0.25	0	18191.6	1977.35	0	0	0	0
MIDO 801	Middle Oconee River	100	10.2	6.7	91.7	0.7					100	+	-	+	-	E. casseliflavus	Lin	0	0	0	0	0	0.16	0	0	0	0	0	0	0	0	0	0	46.16	0	1.6	0	0	0	0.96	0	0	0	55625.9	8971.93	20.3226	3.27784	0.000365344	9.66544
MIDO 802	Hunnicutt Creek	50	10.1	6.73	88.3	0					50	+	-	+	-	E. casseliflavus	Lin	0	7.762	0	0	0	0	0.152	0	0.02	0	0	0	0	0	0	0	0	0	0	0	13.76	0	0.53	0	4.324	0	325847	15370.1	217.492	10.259	0.000667467	19.8312
MIDO 814	Brooklyn Creek	50	12.4	6.7	72.9	3.4					50	+	-	+	-	E. casseliflavus	CipLin	0	39.1333	0	0	0	2.66667	1.2	0	0	0	0	0	0	0	0	0	0	0	1.4	0	39.6	0	0.133333	0	0	0	268288	37262.3	266.37	36.9958	0.00099285	12.6807
MIDO 816	Turkey Creek	50	11.4	6.83	72.7	0.45					50	+	-	+	-	E. casseliflavus	Lin	2.67714	0	0.04	0	0	0.125714	3.57143	0	0.585714	0	0	0	0	0	6.41143	0.131429	0	0	2.63714	0.24	0	0	1.20286	0	0.922857	0	156526	10297.7	32.1122	2.11264	0.000205156	0
MIDO 817	Turkey Creek	50	11.1	6.89	56.7	0.7					50	+	-	-	-	E. casseliflavus	Lin	0	0	0.0233333	0	0	0.173333	0	0	0.556667	0	0	0	0.253333	1.44333	0	0	0	5.22333	0	0	0	0	0.343333	0	0	0	15524.2	1176.08	0	0	0	0
MIDO 818	Brooklyn Creek	250	11.9	6.82	72.9	0.2					250	+	-	-	-	E. casseliflavus	LinSyn	0.944	10.152	0	0	0	0.13	0.334	0	0.244	0	0	0	0	0	0	0	0	0	0	0	2.934	0	0.576	0	0.854	0	258759	80862	12.4859	3.90183	4.82529e-05	0
MIDO 820	Turkey Creek	0	11.3	6.83	69	0.1					0	+	-	-	-	E. casseliflavus	Lin	0	0	0	0	0	0.024	0.997333	0	0	0	0	0	0	0	0	0.92	0	0	0	0	0	0	0.277333	0	0	0	80323.1	4958.22	10.1341	0.625562	0.000126167	0
MIDO 825	Brooklyn Creek	750	12.3	6.76	76.4	2.4					750	+	-	+	-	E. hirae	Lin	0	0	0	0	0	0	0.221818	0	0	0	0	0	0	0	0	0	0	0	0	0	7.14182	0	0.392727	0	0	0	124395	10196.3	1540.98	126.309	0.0123878	9.44175
MIDO 826	Brooklyn Creek	1150	11.5	6.75	84.2	1.4					1150	+	-	+	-	E. casseliflavus	Lin	21.2615	2.24615	59.9077	0	0	13.1077	5.44615	0	12.2154	0	0	14.4615	16.5846	10.7692	14.3385	9.26154	24.7077	10.5538	21.3231	10.0615	0	0	12.7385	0	14.4923	0	160585	11308.8	2623.02	184.72	0.0163342	10.0292
MIDO 828	Middle Oconee River	350	11.9	6.77	81.6	2.3					350	+	-	-	-	E. faecalis	LinTet	0	7.08	0.016	0	0	1.176	0	0	1.92	0	0	0.212	0	0	3.4	0	0	16.092	0	1.728	0	0	1.848	0	0	0	179778	16051.6	38.1398	3.40534	0.000212149	0
MIDO 831	Brooklyn Creek	300	11.8	6.64	118.7	0					300	+	-	-	-	E. hirae	DapLinTet	0	0	0	0	0	0	0	0	0	0	0	0	0	0	1.74316	0	0	0	0.345263	0	1.33263	0	2.84632	0	0	0	71767.3	3552.84	10.4597	0.517808	0.000145745	0
NORO 108	North Oconee River	50	11.6	6.88	69.4	0.15					50	+	-	+	-	E. faecalis	LinTet	45.2	44.56	106.634	0	0	34.9314	13.5029	0	26.0686	0	0	39.8686	35.9086	19.56	31.5486	13.5714	0	40.8571	66.72	25.4114	44.9029	0	40.8686	0	22.0571	0	32039.2	3907.22	0	0	0	0
NORO 114	North Oconee River	200	11.1	6.76	97.2	5.9					200	+	-	-	-	E. casseliflavus	Lin	0	0	0	0	0	0.533333	3.4	0	0.733333	0	0	0	0.0666667	0	0	0.4	14.4	0	4.13333	0.0666667	0	0	0.933333	0	0.466667	0	122076	16955	4.70623	0.653643	3.85516e-05	1.94521
NORO 401	Sandy Creek	0	12.9	6.82	71.5	3					0	+	-	+	-	E. gallinarum	Lin	1.05	0	0	0	0	0	0.95	0	0.4	0	0	0.1	0	0	0	0	0	5.35	0	1.7	0	0	0.7	0	0	0	371962	40430.6	0	0	0	0
NORO 501	Trail Creek	50	10.6	6.74	85.5	6.2					50	+	-	+	-	E. casseliflavus	CipLin	2.61333	0	0	0	0	0	4.42667	0	0.32	0	0	0	0	0	0.533333	0	0	0	1.6	0.693333	0	0	1.54667	0	1.76	0	88468.3	10168.8	0	0	0	0
NORO 503	Trail Creek	100	10.5	6.8	82.9	3.5					100	+	Tet	-	-	E. casseliflavus	Lin	0	8.86667	0	0	0	0	1.4	0	0	0	0	0	0	0	0	0	0	4.73333	1.46667	0	0	0	2.33333	0	1.06667	0	128845	17895.2	190.911	26.5155	0.00148171	5.69405
NORO 505		100	10.1	6.72	96.3	8.8					100	+	-	+	-	E. casseliflavus	Lin	0	0	0.0571429	0	0	0.171429	4.05714	0	0.571429	0	0	0	0.171429	0	1.94286	0.857143	38.1143	0	1.08571	4.51429	31.6571	0	0.514286	0	2.11429	0
NORO 510	North Oconee River	200	11.4	6.71	90.9	6.3					200	+	Tet	+	-	E. casseliflavus	Lin	0	0	0	0	0	0	0	0	0	0	0	0	0	0	0	0	0	0	0.726667	0	0	0	2.71333	0	1.23333	0	342063	47508.8	14.2865	1.98423	4.17656e-05	0
NORO 511	Trail Creek	700	11	6.81	73.5	7.2					700	+	-	+	-	E. casseliflavus	Lin	0	40.1333	0.2	0	0	0.666667	2.86667	0	0.266667	0	0	0	0	0	1	0	0	1.53333	0.533333	0	0	0	0	0	0	0	67001.7	9305.8	21.0302	2.92087	0.000313876	0
NORO 512	Trail Creek	100	10.4	6.79	77.6	5.5					100	+	-	-	-	E. hirae	DapLinTet	0	2.33333	0	0	0	2.4	0	0	0	0	0	0.0666667	0	2.66667	0	0	36.8667	0	0	0	0	0	1.73333	0	1	0	24366.8	3384.28	0	0	0	0
NORO 514	Trail Creek	450	11.2	6.78	79.3	4.4					450	+	-	+	-	E. faecalis	Lin	0	0	0	0	0	0	0.24	0	0	0	0	0	0	0	0	0	0	4.37143	0	0	0	0	0.8	0	1.04	0	192136	23431.2	16.3085	1.98884	8.488e-05	0
NORO 519	Trail Creek	200	11.5	6.86	56.2	5.7					200	+	-	+	-	E. casseliflavus	Lin	0	0	0	0	0	0.133333	0	0	0.933333	0	0	0	0	2.35333	0	0	0	0	0	0	2.57333	0	0.52	0	0	0	125502	17430.9	0	0	0	0
NORO 520	North Oconee River	3800	12	6.64	144.2	4.3	Escherichia coli	AmpFazFotFoxPodTazAxoCep		blaCMY-2	3800	+	GenSul	+	-	E. avium	LinTet	3.26667	2.73333	0.0666667	0	0	0	2.13333	0	0	0	0	0.133333	0	0.133333	0	0	80.9333	0	0.8	1.46667	42.1333	0	6.2	0	0.466667	0	7.47411e+06	1.03807e+06	11043.3	1533.79	0.00147754	914.421
NORO 527	North Oconee River	150	11.9	6.7	133.7	2.8	Escherichia coli	AmpFazFotPodAxoCepCipGen	ESBL	blaCTX-M, blaTEM	150	+	-	+	-	E. faecalis	Lin	0	0	0	0	0	0	0	0	0	0	0	0.168889	0	1.90667	2.39111	0	0	0	0	0	0	0	5.08889	0	0	0	1.68945e+06	165632	937.688	91.9302	0.000555026	28.9655
							Escherichia coli	AmpFazFotPodTazAxoCepCipGen	ESBL	blaCTX-M, blaTEM
NORO 605	North Oconee River	50	10	6.87	42						50	+	-	+	Amo/ClaAmpFoxTioAxoChlGenStrSulTet (2)	E. faecalis	Lin	0	0	0	0	0	0	0.866667	0	0.733333	0	0	0	0	0	0.766667	0.0666667	30.6	0	2.03333	0.0333333	0	0	0.233333	0	0	0	543209	41152.2	30.4664	2.30806	5.60859e-05	0
NORO 609	North Oconee River	150	11.9	6.71	119.1	5					150	+	-	-	-	E. casseliflavus	Lin	0	0.65	0.45	0	0	0.55	1.15	0	0	0	0	0.1	0.3	0.6	1.2	0	48	0	2.35	0	0	0	6.45	0	0	0	480197	52195.4	40.257	4.37576	8.38342e-05	0
NORO 615	Tanyard Creek	1750	11.1	6.61	151.4	1.7					1750	+	-	+	-	E. pseudoavium	Tet	0	0	0	0	0	0	0	0	0.23	0	0	0.165	0	0	0	0	46.055	3.775	4.445	0	0	0	0.9	0	1.23	0	1.33221e+06	144805	1191.62	129.524	0.000894468	138.472
MIDO influent	WWTP						Enterobacter spp.	AmpFazFotFoxPodTazAxoCepCip		blaSHV		+	AmpAziCipNalStrSulTri/Smx	+	-	E. durans	Lin	0	13.5886	4.32	0	0	0	0.171429	0	0	0	0	0.354286	0	0	6.16	0	0	0	13.04	0	0	0	7.23429	0	0	0	196896725	4.18929e+07	790201	168128	0.00401328	11793
	WWTP						Enterobacter spp.	AmpFazFotFoxPodAxoCepMerP/T4	CRE	blaSHV
MIDO effluent	WWTP											-	-	-	-	E. faecium	Lin	0	10.14	11.28	0	0	0	81.34	16.34	15.74	0	0	0.08	0	0	3.34	1.82	0	0	85.08	0	0	0	1.26	0	2	0	7.81219e+06	368500	8475.85	399.804	0.00108495	367.051
NORO influent	WWTP											+	-	+	-	Ent species	Lin	0	0	120.606	0	0	1.94286	55.9086	0	1.86286	0	0	0.937143	0.617143	0	0	0	0	26.7657	114.457	43.52	0	0	42.6743	0	0	0	7.25103e+07	1.54277e+07	888342	189009	0.0122512	21580.4
NORO effluent	WWTP						Escherichia coli	AmpFazFotPodTazAxoCepCip	ESBL	blaCTX-M, blaTEM		+	-	-	-	E. gallinarum	EryLinSynTyl	2.14	6.74	5.64	0	0	0	16.84	0	8.14	0	0	0.28	0.26	0	0	0	58.72	1.94	31.44	0.14	0	0	0.12	0	0.4	0	1.06291e+08	5.0137e+06	700722	33052.9	0.00659252	19271.9
Cedar influent	WWTP											+	AmpStrSul	+	Tet (2)	E. avium	LinTet	0	52.8	26.4	0	0	38	123.733	0	20.5333	0	0	1.33333	0	0	0	14.2667	163.333	0	173.467	11.7333	0	0	70.6667	0	0.933333	0	1.54653e+07	3.6822e+06	76422.5	18195.8	0.00494156	1989.09
Cedar effluent	WWTP											+	-	-	-	E. faecium	LinTet	0	0.4	7.04	0	0	0.12	20.68	0	20.78	0	0	0.32	0.24	0.58	0	8.22	0	3.56	18.36	4.9	0	0	53.4	0	0	0	3.95881e+06	1.23713e+06	2336.65	730.202	0.000590239	28.0946
Grey box = sample not analyzed or could not be analyzed
Antibiotics: amoxicillin (Amo), amoxicillin/clavulanic acid (Amo/Cla), ampicillin (Amp), azithromycin (Azi), cefazolin (Faz), cefepime (Fep), cefotaxime (Fot), cefotaxime/clavulanic acid (Fot/Cla),
cefoxitin (Fox), cefpodoxime (Pod), ceftazidime (Taz), ceftazidime/clavulanic acid (Taz/Cla), ceftiofur (Tio), ceftriaxone (Axo), cephalothin (Cep), chloramphenicol (Chl), ciprofloxacin (Cip),
daptomycin (Dap), erythromycin (Ery), gentamicin (Gen), imipenem (Imi), kanamycin (Kan), lincomycin (Lin), linezolid (Lnz), meropenem (Mer), methicillin (Met), nalidixic acid (Nal), nitrofurantoin (Nit)
oxacillin (Oxa), penicillin (Pen), piperacillin/tazobactam (P/T4), synercid (Syn), streptomycin (Str), sulfamethoxazole (Smx), sulfisoxazole (Sul), tetracycline (Tet), tigecycline (Tig), trimethoprim (Tri),
trimethoprim/sulfamethoxazole (Tri/Smx), tylosin (Tyl), and vancomycin (Van).
[truncated: 14 more columns]

## Sheet: S2
Table S2. Masterfile for 2018 Winter Sampling
Sample site	Watershed/ WWTP	Environmental parameters					ESBL/ CRE				E. coli		Salmonella		Enterococcus		antibiotic concentrations (ng/L)																										gene copies
		E. coli counts (CFU/ml)	temperature (°C)	pH	conductivity (µS/cm)	turbidity (NTU)	organism	AR phenotype	ESBL/CRE	β-lactamase gene	Presence	AR phenotype	Presence	AR phenotype	species	AR phenotype	Amo	Amp	Azi	Axo	Taz	Tio	Cip	Dap	Ery	Gen	Kan	Lin	Lnz	Mer	Met	Nal	Oxa	Pen	Smx	Sul	Str	Tig	Tri	Tet	Tyl	Van	bact16S_copies_uL	bact16S_copies_mL	ermB_copies_uL	ermB_copies_mL	ermB_ratio_to_16S	tetB_copies_uL	tetB_copies_mL
BICO 101	Oconee River	0	4.7	6.55	105.2	3.8	Escherichia coli	AmpFazFotFoxPodTazAxoCepCipGen	ESBL	blaCMY-2, blaCTX-M, blaTEM	+	SulTetTri/Smx	-	-	E. casseliflavus	LinSyn	0	0	0	0.617493	0	0	0	22.1948	0	3.05421	0	0	0	0	0	0	6.64669	0.433728	0.0457236	0	0	0	0	0	0.106709	0	12740.1	1249.03	0	0	0	0	0
BICO 201	Shoal Creek	50	7.5	6.63	59.8	3.3					+	-	+	-	E. hirae	Lin																											40279.6	5594.4	0	0	0	0	0
MIDO 301	Bear Creek	1600	6.7	6.7	56.2	1.5	Serratia fonticola	AmpFazFotPodAxoCep	ESBL	blaCTX-M	+	-	-	-	E. faecalis	LinTet	0	0	0	0	0	15.034	0	0	0	119.136	0	0	0	0	0	0	0	0	0	0	26.0704	0	0.105805	0	0.209672	0	7644.98	415.488	0	0	0	0	0
MIDO 601	McNutt Creek			6.68	65.6	2.9	Serratia fonticola	AmpFazFotPodAxoCep	ESBL	blaCTX-M	-	-	-	-	-	-
MIDO 604	McNutt Creek	0	6.9	6.62	65.1	3.4					+	-	-	-	E. gallinarum	LinTet	2.86981	0	0.00712036	0	0	0	0.0922307	0	0.00849249	34.36	0	0	0	0	0	0	0	0	0	0.0975974	0	0	0.188027	0.13187	0.138223	0
MIDO 605	McNutt Creek	0	7	6.6	64.4	3.5					+	-	+	-	E. faecalis	Lin	0	0	0.41	0	0	17.5839	0.02	1472.81	0	42.0378	0	0	0.05	0	0	0	502.599	0	0	0	0	0	0	0	0.5343	0	9891.37	1075.15	0	0	0
MIDO 606	McNutt Creek	150	6.9	6.73	59.2	3.4	Serratia fonticola	AmpFazFotFoxPodAxoCep	ESBL	blaCTX-M	+	-	+	-	E. faecalis	Lin	0	0	0	0	0	0	0.01	0	0.00447522	0	0.00022335	0	0	0	0	0	0	0	0.00353046	0	0	0	0.00199156	0	0.00617533	0	9925.46	1210.42	0	0	0	0	0
MIDO 608	McNutt Creek	50	6.9	6.64	63.7	3.3					+	-	-	-	E. gallinarum	CipLinTet																											52088.8	8138.87	0	0	0	0	0
MIDO 609	McNutt Creek	500	7.9	6.81	61.2	3.9					+	-	+	-	E. casseliflavus	CipLin	0	0	0.00840973	0	0	0	0	0	0	31.1631	0	0	0	0	0	0	0	0	0	0.0720942	0	0	0.165677	0	0.106836	0	15184.8	1195.65
MIDO 610	McNutt Creek	0	7.9	6.52	83.1	0.87	Serratia fonticola	AmpFazFepFotFoxPodAxoCep	ESBL	blaCTX-M	+	-	+	-	E. gallinarum	CipLinTet	3.86402	0	0.00854333	5.18752	36.3376	3.63367	0	0	0.131304	0	0	0	0.0296901	0	0.0868417	0	0	0	0	0	0	0	0.0473385	0	0.420471	0	585849	45065.3	0	0	0	0	0
MIDO 611	McNutt Creek	0	6.4	6.7	59.4	4.9	Serratia fonticola	AmpFazFotPodAxoCep	ESBL	blaCTX-M	+	-	+	-	E. casseliflavus	Lin	12.3394	0	0	0	0	4.48007	0	0	0	45.4722	0	0	0.109722	0	0	0	0	0	0.166494	0.066465	0	0	0.113474	0	0.187029	0	6463.71	718.19	0	0	0	0	0
MIDO 612	McNutt Creek	50	6.7	6.62	65.7	2.6					+	-	-	-	E. casseliflavus	Lin	0	0	0.0540831	0	152.296	0	0.186359	0	0.0378636	0	0	0	0	0	0	0	0	0	0.484598	0	0	0	0.238133	0	0.582875	0	4046.99	367.908	0	0	0	0	0
MIDO 613	McNutt Creek	50	5.9	6.78	64.2	5.9					+	-	+	-	E. casseliflavus	Lin	0	0	0.00114168	0	0	9.74258	0.116738	0	0	0	0	0	0	0	0.0578512	0	0	0	0	0	0	0	0.117143	0	0.120939	0	26187.6	2846.48	0	0	0	0	0
MIDO 616	McNutt Creek	0	7.9	6.53	79.7	0.45					+	-	-	-	E. faecalis	Lin																											139982	19441.9	0	0	0	0	0
MIDO 617	McNutt Creek	550	8.9	6.74	62.2	7					+	-	-	-	E. faecalis	Lin	0	0	0	0	0	0	0.106512	0	0.0197522	25.4041	0	0.01	0	1.87575	0	0	0	0	0	0	0	0	0.0852277	0	0.231711	0	2733.2	300.352	0	0	0	0	0
MIDO 706	Calls Creek	50		6.68	47.5	3.5	Serratia fonticola	AmpFazFotPodAxoCep	ESBL	blaCTX-M	+	-	+	-	E. casseliflavus	Lin																											20248.6	2629.69	0	0	0	0	0
MIDO 707	Calls Creek	100	6.4	6.59	128.1	0.95	Serratia fonticola	AmpFazFotFoxPodAxoCep	ESBL	blaCTX-M	+	-	+	-	E. casseliflavus	Lin	14.612	15.5242	0	0	75.7701	0	0	0	0.00815231	0	0	0	0.0164239	0	0.0256601	0	0	0	0.647317	0	0	0	0.134763	0	0.0939981	0	503623	44966.3	484.06	43.2196	0.000961155	7.78543	0.695127
							Serratia fonticola	AmpFazFotPodAxoCep	ESBL	blaCTX-M
MIDO 709	Calls Creek	400		6.63	67	1.8	Serratia fonticola	AmpFazFotFoxPodAxoCep	ESBL	blaCTX-M	+	-	-	-	E. faecalis	Lin	0	0	0.00189367	5.27942	0	1.20859	0	0	0.0147345	0	0	0	0	3.89754	0	0	0	0	0	0.131383	0	0	0.191443	0	0.201573	0	607828	46756	0	0	0	0	0
MIDO 712	Calls Creek	200		6.55	81.5	0.25					+	-	+	-	E. casseliflavus	Lin	10.0396	0	0.00259098	0	0	0	0	0	0.00692598	0	0	0	0.0245525	0	0	0	0	0	4.03795	0	0	0	0.231033	0	0	0	33308.1	1699.39	0	0	0	0	0
MIDO 719	Middle Oconee River	50	4.7	6.56	99.1	3.4	Serratia fonticola	AmpFazFotPodAxoCep	ESBL	blaCTX-M	+	-	-	-	E. hirae	DapLin																											155903	16946	37.8586	4.11506	0.000242834	0	0
MIDO 801	Middle Oconee River	50	5.2	6.56	95.4	3.1	Serratia fonticola	AmpFazFotPodAxoCepImi	CRE, ESBL	blaCTX-M	+	-	+	-	E. faecalis	Lin	0	0	0	0	0	0	0.01	0	0.0550332	1.86388	0	0	0	0	0	0.58241	0	0	0.0321675	0	0.1	0	0.0485654	0	0.026104	0	139813	13707.2	0	0	0	0	0
MIDO 802	Hunnicutt Creek	50	6.9	6.53	86	0.77	Serratia fonticola	AmpFazFotFoxPodAxoCep	ESBL	blaCTX-M	+	-	+	-	E. hirae	LinTet																											361578	25827	41.0426	2.93162	0.00011351	0	0
MIDO 816	Turkey Creek	50	7	6.79	66.4	0.37	Serratia fonticola	AmpFazFotFoxPodAxoCep	ESBL	blaCTX-M	+	-	-	-	E. faecalis	Lin	0	40.5968	0	0	0	0	0	2.25888	0.0045222	0.0788793	0	0	0	0	0	0	0	0	0	0	0	0	0.0239282	0	0.017512	0	29877.8	1572.52	0	0	0	0	0
MIDO 817	Turkey Creek	200	7.9	6.79	59.7	0.55	Serratia fonticola	AmpFazFepFotFoxPodTazAxoCep	ESBL	blaCTX-M	+	-	-	-	E. casseliflavus	Lin	2.38471	0	0.00441824	0	0	12.2574	0.0618246	0	0	0	0	0	0	0	0.170718	0	0	0	0	0	0	0	0.623863	0	0.0854631	0	205699	12697.5	0	0	0	0	0
							Serratia fonticola	AmpFazFotFoxPodAxoCep	ESBL	blaCTX-M
MIDO 820	Turkey Creek	150	8.4	6.76	52	2.6	Serratia fonticola	AmpFazFotFoxPodAxoCep	ESBL	blaCTX-M	+	-	-	-	E. gallinarum	LinTet	0	0	0	5.06315	0	9.5785	0	0	0	0	0	0	0	1.54258	0	0	0	0	0	0	0	0	0.136268	0	0.0857664	0	62911.5	4007.1	0	0	0	0	0
MIDO 825	Brooklyn Creek	200	9.5	6.61	73.6	1.7					+	Amp	+	-	E. gallinarum	LinTet																											331648	39481.8	9.80735	1.16754	2.95716e-05	0	0
MIDO 826	Brooklyn Creek	0		6.4	148.4	0.45					+	-	-	-	E. hirae	Lin	0	41.0426	0	0	0	0	0	11.231	0.011213	0	0	0	0	0.140857	0	0	0	0	0.00575372	0	0	0	0.0134821	0	0.00849413	0	247585	11678.5	0	0	0	0	0
NORO 108		0	8.3	6.82	65	0.85					+	-	-	-	E. faecalis	Lin
NORO 114	North Oconee River	0	5.5	6.76	84.8	3.4	Serratia fonticola	AmpFazFotFoxPodAxoCep	ESBL	blaCTX-M	+	-	-	-	E. casseliflavus	Lin	0	0	0.00584507	0	0	0	0.120741	0	0.0637984	12.5121	0	0.2	0.0630141	0	0	0	0	0	0.65818	0.0670128	0	0	0.736842	0.152805	0.0937825	0	20701.7	2379.51
NORO 401	Sandy Creek	0	5	6.9	69.5	5.2					+	-	+	-	E. casseliflavus	Lin	0	0	0.00900252	0	0	0	0	0	0.0377987	0	0.1	0	0.0463847	0	0	0	0	0	0	0	0	0	0.521798	0	0.540077	0	1.01524e+06	67682.5	32.2812	2.15208	3.17967e-05	0	0
NORO 501	Trail Creek	150	10	6.6	73.7	6.8					+	Tet	+	-	E. hirae	Lin	0	0	0	0	0	0	0.01	25.211	0.00608394	0	0	0	0	0.0450665	0	0	0	0	0.000840661	0	0	0	0.00211296	0	0.00428423	0	24814.8	1747.52	0	0	0	0	0
NORO 502	North Oconee River	1400	9.8	6.45	197.5	0					+	AmpChlStrSulTetTri/Smx	+	-	Ent species	Lin	0	16.3977	0.00375177	0	0	0	0	0	0.0762151	0	0	3.7972	0	0	0	0	0	0	0.881411	0	26.5354	0	0.382661	0	0.107913	0	1.94534e+06	91761.1	7525.89	354.995	0.00386868	7.51661	0.354557
NORO 511	Trail Creek	0	7.8	6.64	65.5	1.8	Serratia fonticola	AmpFazFotFoxPodAxoCep	ESBL	blaCTX-M	+	-	+	-	E. casseliflavus	CipLin	4.38218	14.5392	0	6.58314	0	0	0	0	0.00592362	35.6121	0	0	0.0273871	0	0	0	0	0	0.138595	0.124718	0	0	0.0614549	0	0.158225	0	100678	13983.1	0	0	0	0	0
NORO 514	Trail Creek	200	6.8	6.63	80.8	3.5					+	-	-	-	E. faecalis	EryLinTetTyl																											847787	94198.5	23.6741	2.63045	2.79246e-05	0	0
NORO 517	North Oconee River	150	8.7	6.45	296.2	0					+	-	+	-	E. casseliflavus	Lin	0	0	0	0	0	0	0	0	0	0	0	0	0	0	0	0	0	0	0	0	0	0	0	0	0	0	101710	4797.66	0	0	0	0	0
NORO 518	North Oconee River	700	32	6.41	302	1.1					+	-	-	-	E. hirae	LinStrTet	0	6.26642	0	0	0	0	1.7671	0	0	0.0307533	0	0	0.04	0.110284	0	0.249484	0	0	0	0.0770375	0	0	0	0.100839	0	0.229261	204960	15527.3	0	0	0	0	0
NORO 520	North Oconee River	50	7.9	6.68	131.5	0.9					+	-	+	-	E. casseliflavus	Lin	0	0	0.00449725	5.82555	0	3.85036	0.198133	0	0	22.552	0	0	0	1.02129	0.268238	0	0	0	0	0	0	0	0.246998	0.276293	0	0	334239	35557.3	160.153	17.0376	0.000479158	0	0
NORO 527	North Oconee River	0	8.7	6.69	124.6	0.95					+	-	+	-	E. faecium	Lin	0	0	0	0	0	5.02161	0	0	0.00334141	121.95	0	0	0	0	0.195799	0	0	0	0	0.0806075	0	0	0.129826	0	0.756411	0	187512	20834.7	0	0	0	0	0
NORO 603	Carr Creek	0	7.9	6.28	552	0.85					+	-	-	-	E. hirae	Lin																											653.424	52.6955	0	0	0	0	0
NORO 604	Carr Creek	0	7.5	6.32	630	3.5	Serratia fonticola	AmpFazFotPodAxoCepImi	CRE, ESBL	blaCTX-M	+	-	-	-	-	-	2.03764	0	0	0	77.7978	19.8639	0	0	0	0	0	0.25	0	0	0	0	0	0	0	0.119201	26.0351	0	0.132298	0	0	0	437.879	39.0963	0	0	0	0	0
NORO 611	Carr Creek	0	7.1	6.57	93.4	1.7					+	-	-	-	E. casseliflavus	Lin	0	0	0	0	0	0	0	0	0.0087876	0	0	0	0	0	0.564448	0	0	0	0	0.0629214	26.1872	0	0.232081	0	0.535602	0	986331	69952.6	0	0	0	0	0
NORO 627	North Oconee River	0	9.3	6.55	216	0					+	-	-	-	E. hirae	DapLin																											39414.1	3864.13	0	0	0	0	0
MIDO influent	WWTP	1600000					Citrobacter freundii	AmpFazFotPodAxoCepCip		blaKPC, blaSHV	+	-	+	-	E. raffinosus	LinPen	0	0	0	0	0	17.3974	0	129.976	0	0	0.00131462	0.01	0.05	0	0	0	10.6013	0	0.110592	0	0	0	0.425943	0	1.07266	0	287102275	7.75952e+07	1.01313e+06	273818	0.00352881	32520.5	8789.33
MIDO effluent	WWTP						Enterobacter asburiae	AmpFazFotFoxPodAxoCepImi	CRE	blaKPC							0	0	22.8554	0	0	0	4.564	0	86.3487	88.9873	0	0	1.45189	0	2.11439	0	0	0	34.9727	0	26.7468	0	91.4845	2.79021	19.9356	0	1.19483e+06	35560.3	88.6221	2.63756	7.41714e-05	0	0
NORO influent	WWTP	550000					Escherichia coli	AmpFazFotPodAxoCepGen	ESBL	blaCTX-M, blaTEM	+	-	+	-	E. faecium	Lin	0	0	0	0	686.02	37.7557	0	1292.63	0	199.588	0	3.96044	0	0	0	0	0	0	27.2925	0	0	0	0	0	91.6271	0	358238500	9.95107e+07	1.21723e+06	338121	0.00339783	56500.1	15694.5
NORO effluent	WWTP	0									+	-	-	-	E. gallinarum	Lin	91.0348	0	16.2779	0	0	0	0	0	47.6326	0	0	0	0	0	0	0	0	0	20.7653	0	0	0	2.09215	1.22245	2.972	0	1.63688e+07	810339	5406.78	267.662	0.000330309	106.203	5.25759
Cedar influent	WWTP	1450000					Escherichia coli	AmpFazFotFoxPodTazAxoCepCipGen		blaCMY-2, blaOXA-1	+	-	+	Str (2)	E. faecium	CipDapNitTet	0	18.3033	0	21.8967	285.717	37.7557	0	0	0	0	0	4.57419	0	0	0	0	0	0	27.3415	0	28.2394	0	0	0.749258	33.3213	0	298606100	1.40852e+07	605008	28538.1	0.00202611	4910.69	231.636
Cedar effluent	WWTP	0									+	Amo/ClaAmpFoxTioAxo	-	-	E. faecium	Lin	0	0	1.83	0	0	0	0.03	0	3.83961	0	0	0.14	0	0	0	0.18262	0	0	0.581496	0	0	0	2.4659	1.5424	7.61372	0	1.11199e+07	855380	3613.03	277.926	0.000324915	12.5302	0.963864
Grey box = sample not analyzed or could not be analyzed
Antibiotics: amoxicillin (Amo), amoxicillin/clavulanic acid (Amo/Cla), ampicillin (Amp), azithromycin (Azi), cefazolin (Faz), cefepime (Fep), cefotaxime (Fot), cefotaxime/clavulanic acid (Fot/Cla),
cefoxitin (Fox), cefpodoxime (Pod), ceftazidime (Taz), ceftazidime/clavulanic acid (Taz/Cla), ceftiofur (Tio), ceftriaxone (Axo), cephalothin (Cep), chloramphenicol (Chl), ciprofloxacin (Cip),
daptomycin (Dap), erythromycin (Ery), gentamicin (Gen), imipenem (Imi), kanamycin (Kan), lincomycin (Lin), linezolid (Lnz), meropenem (Mer), methicillin (Met), nalidixic acid (Nal), nitrofurantoin (Nit)
oxacillin (Oxa), penicillin (Pen), piperacillin/tazobactam (P/T4), synercid (Syn), streptomycin (Str), sulfamethoxazole (Smx), sulfisoxazole (Sul), tetracycline (Tet), tigecycline (Tig), trimethoprim (Tri),
trimethoprim/sulfamethoxazole (Tri/Smx), tylosin (Tyl), and vancomycin (Van).
[truncated: 13 more columns]

## Sheet: S3
Table S3. Masterfile for 2018 Spring Sampling
Sample site	Environmental parameters					ESBL/ CRE				E. coli		Salmonella		Enterococcus		antibiotic concentrations (ng/L)																										gene copies
	E. coli counts (CFU/ml)	temperature (°C)	pH	conductivity (µS/cm)	turbidity (NTU)	organism	AR phenotype	ESBL/CRE	β-lactamase gene	Presence	AR phenotype	Presence	AR phenotype (no. of isolates)	species	AR phenotype	Amo	Amp	Azi	Axo	Taz	Tio	Cip	Dap	Ery	Gen	Kan	Lin	Lnz	Mer	Met	Nal	Oxa	Pen	Smx	Sul	Str	Tig	Tri	Tet	Tyl	Van	bact16S_copies_uL	bact16S_copies_mL	ermB_copies_uL	ermB_copies_mL	ermB_ratio_to_16S	tetB_copies_uL	tetB_copies_mL	tetB_ratio_to_16S
BICO 101	100					Klebsiella pneumoniae	AmpFazPodTazCep	ESBL	blaKPC	+	-	-	-	E. casseliflavus	LinSyn	9.67505	0	0	0	0	7.71101	0	0	0	0	0	0	0	0	18.8177	0	7.10733	0	1.06435	6.30841	0	27.499	4.20798	0	0	0	40296.4	1900.77	0	0	0	0	0	0
						Serratia fonticola	Cep		blaCTX-M
MIDO 103	50	16.5	7.22	84.4	21.9					+	-	+	-	E. casseliflavus	Lin	0	21.2233	0.391036	0	0	12.6862	0	0	0	0	0	0	0	0	0	0	0	0	0	60.5055	0	0	6.09145	0	3.96207	0	1.15486e+06	186267	23.2213	3.74537	2.01076e-05	0	0	0
MIDO 301	50		7.77	52.1	3	Serratia fonticola	FazCep		blaCTX-M	+	-	+	-	E. casseliflavus	Lin	0	0	0	0	0	3.14368	2.04561	0	0	0	0	0	0	0	4.40142	0	0	0	0	3.26062	0	0	1.09352	15.6524	0	35.4354	62070.2	5087.72	0	0	0	0	0	0
						Serratia fonticola	AmpFazCep		blaCTX-M
MIDO 305	1600	17.6	6.85	56.6	17	Serratia fonticola	FazCep		blaCTX-M	+	-	-	-	E. hirae	DapLin	0	0	0.102224	0	0	13.9684	0	0	0.452975	0	0	44.7594	0	4.69148	0	0	0	13.1615	0	0	0	0	2.96029	42.2156	28.0779	0
						Serratia fonticola	AmpFazCep		blaCTX-M
MIDO 601	0		7.11	63	8.7	Serratia fonticola	FazCep		blaCTX-M	+	-	-	-	E. faecalis	Lin	0	4.55542	0	88.1093	0	9.80413	9.38166	32.3799	1.82128	0	0	75.8053	0	6.07519	0	0	0	0	0	0	1.87264	0	4.43333	43.7869	0	76.7957	75641.5	14546.4	0	0	0	0	0	0
MIDO 604	100	14.9	7.54	62.9	7.6					+	-	+	-	E. faecalis	Lin																											180543	34719.8	5.95712	1.1456	3.29956e-05	0	0	0
MIDO 605	250	14.7	7.34	65.3	16	Serratia fonticola	FazCep		blaCTX-M	+	-	+	-	E. gallinarum	Lin	0	0	0.137934	0	0	0	4.43713	0	0	0	0	0	0.113189	22.8619	0	0	0	0	0	0	0	0	2.19982	43.0059	5.41063	87.1982	69044.1	13277.7	0	0	0	0	0	0
						Serratia fonticola	AmpFazPodCep		blaCTX-M
MIDO 606	200	15.3	6.97	61.2	9.3					+	-	+	-	E. hirae	Lin																											91575.8	14770.3	0	0	0	0	0	0
MIDO 608	300	15.5	7.04	61.4	11	Serratia fonticola	AmpFazCep		blaCTX-M	+	-	+	-	E. casseliflavus	CipLin	0	7.02578	0	0	0	0	0	0	0	0	0	259.749	0	0	0	0	0	6.71677	0	0	12.2347	0	3.26319	0	13.7309	0	250765	48224.1	8.30148	1.59644	3.31046e-05	0	0	0
						Serratia fonticola	FazFotCep	ESBL	blaCTX-M
MIDO 609	300	15.1	7.11	64.6	3.7	Serratia fonticola	AmpFazCep		blaCTX-M	+	-	-	-	E. casseliflavus	Lin	0	0	0.96067	0	0	2.01764	13.3886	0	5.42072	0	0	0	1.58944	0	13.5903	0	0	9.57625	0	0	0	0	2.82907	27.9197	21.3478	0
MIDO 610	150	15.3	7.33	67.2	8.4	Serratia fonticola	AmpFazCep		blaCTX-M	+	-	+	-	E. faecalis	Lin	0	0	0.218259	0	0	0.941264	4.27504	0	0	0	0	0	1.56284	0	0	0	0	0	0.276787	0	159.291	29.9533	2.03361	5.74711	33.5888	0	285114		0	0	0	0	0	0
						Serratia fonticola	AmpFazPodCep		blaCTX-M
MIDO 611	150		6.94	61.1	11	Serratia fonticola	AmpFazCep		blaCTX-M	+	-	+	-	E. hirae	DapLin	0	31.992	0	0	0	0	4.74714	0	0	0	0	37.591	0	6.11338	0	0	0	0	0	0	18.4517	0	2.39249	43.5385	8.72229	0	153.53	29.525	0	0	0	0	0	0
						Serratia fonticola	FazCep		blaCTX-M
MIDO 612	0	15.4	7.5	64.3	8.6	Serratia fonticola	FazCep		blaCTX-M	+	-	+	-	E. casseliflavus	Lin	16.3053	0	0.0751067	0	0	11.9353	0	0	0	0	0	0	0	15.8402	0	0	0	0	0.303482	0	40.9104	0	4.98741	0	0	0
						Serratia fonticola	AmpFazCep		blaCTX-M
MIDO 613	400	15.7	7.44	67.6	12.7					+	-	-	-	E. hirae	DapLin	0	0	0	0	0	12.2619	7.27237	0	0	0	0	0	0	0	3.19653	0	103.285	10.0277	0	0	0	0	2.67541	0	5.64987	0	179362	28929.3	12.6968	2.04786	7.07886e-05	0	0	0
MIDO 614			6.96	59.9	17					-	-	-	-	-	-	67.581	293.275	0	0	0	0	10.3127	0	21.9319	0	0	0	0	12.3314	50.014	0	593.199	0	0	0	0	0	7.93589	0	0	0
MIDO 616	0	15.4	6.89	79	3.8	Serratia fonticola	FazCep		blaCTX-M	+	-	-	-	E. hirae	Lin	0	0	0	0	0	0	0	0	0	0	0	0	2.1816	0	0	0	0	8.83805	0	20.7031	0	0	2.0675	3.77411	63.6252	0	214233	29754.6	0	0	0	0	0	0
MIDO 617	650	16	6.88	57.4	19					+	-	-	-	E. faecalis	Lin	4.60209	0	0.250618	0	132.863	1.2552	0	0	0	0	0	62.487	0	3.49689	0	0	0	0	0	0	0	0	0	43.7421	0	0	54711.7	10521.5	0	0	0	0	0	0
MIDO 706	200	14.9	7.74	68	15.3	Serratia fonticola	AmpFazPodCep		blaCTX-M	+	-	+	-	E. casseliflavus	Lin	10.3363	0	0	350.925	0	0	0	0	0	37.8824	0	20.2331	0	0	0	0	0	0	4.49512	0	0	0	0	22.5844	0	0	164.99	31.7288	0	0	0	0	0	0
						Serratia fonticola	FazCep		blaCTX-M
MIDO 707	100	14.4	7.16	91.1	8.4	Serratia fonticola	FazCep		blaCTX-M	+	-	+	-	E. hirae	DapLin	0	45.9495	0.292348	0	0	0	0	0	1.00491	0	0	0	0.167078	0	5.13067	0	0	0	2.53037	0	0	0	7.55083	30.9412	0	237.986	1972.31	93.0335	0	0	0	0	0	0
MIDO 709	100	14.6	7.62	68.2	4.3	Serratia fonticola	AmpFazCep		blaCTX-M	+	-	-	-	E. hirae	Lin	0	0	0	0	0	0	4.91059	0	0	0	0	0	0	0	0	0	0	0	2.16215	0	0	0	0	11.3163	0	0	165166	17952.8	0	0	0	0	0	0
MIDO 712	50	14.3	7.04	81.1	1.5					+	-	+	-	E. casseliflavus	LinSyn	0	0	0.111449	0	0	0	3.58234	0	0	0	0	0	0	0	2.87166	0	0	5.06929	3.42452	0	0	0	1.08375	0	5.66643	23.2057	58546.5	4798.9	4.55724	0.373544	7.78396e-05	0	0	0
MIDO 719	50		7.39	83.4	34					+	-	+	-	E. hirae	Lin	0	50.8163	0	0	0	0	0	27.3216	1.38582	0	0	0	0	0	0	0	0	3.64701	1.81847	4.1748	0	0	1.62133	12.022	0	0	1016.21	47.9344	0	0	0	0	0	0
MIDO 801	0	16.3	6.99	74.7	24.8					+	-	+	-	E. faecalis	Lin	0	23.6516	0.0789851	0	0	0	4.10212	167.809	5.18203	0	0	124.4	0	10.5379	0	0	0	7.09765	0	6.26303	0	0	7.02045	0	0	170.194	24604.8	4731.69	0	0	0	0	0	0
MIDO 802	200	14.3	7.04	47.1	2.5	Serratia fonticola	AmpFazPodCep		blaCTX-M	+	-	+	-	E. casseliflavus	Lin	0	0	0.235725	0	0	0	0	0	0	0	0	0	0.651124	0	0	0	0	0	0	0	0	0	2.84749	42.2409	0	85.6888	339532	65294.5	213.311	41.0214	0.000628252	8.56414	1.64695	2.52234e-05
						Serratia fonticola	AmpFazCep		blaCTX-M
MIDO 804	200	16.7	7.26	59.7	3.6					+	-	-	-	E. hirae	DapLin																											507759	81896.6	0	0	0	0	0	0
MIDO 816	100	15.8	6.8	68.8	2.8	Serratia fonticola	FazPodCep		blaCTX-M	+	-	-	-	E. casseliflavus	Lin	0	0	0.210661	0	0	0.530989	2.75029	0	0	0	0	42.848	0.946487	0	0	0	0	11.5657	0	0	0	0	3.35654	0	8.71688	0	216979	19373.1	22.1616	1.97871	0.000102137	0	0	0
						Serratia fonticola	FazCep		blaCTX-M
MIDO 817	550	15.4	6.81	60.4	3.4					+	-	+	-	E. faecalis	Lin	0	0	0	0	0	0	0	27.6595	0	0	0	0	0.698928	0	0	0	0	0	0	0	0	0	2.45176	21.2929	4.27997	0	142851	15527.3	0	0	0	0	0	0
MIDO 820	0	14.5	7.34	53.4		Serratia fonticola	AmpFazPodCep		blaCTX-M	+	-	+	-	E. hirae	DapLin	0	0	0	0	0	0	3.48857	0	1.9651	0	0	0	0	0	0	0	0	3.06611	0	0	0	0	0.995272	0	0	1.89524
						Serratia fonticola	AmpFazCep		blaCTX-M
MIDO 825	0	14.4				Serratia fonticola	AmpFazPodCep		blaCTX-M	+	-	-	-	E. faecalis	LinTet	5.14075	0	0	426.004	0	0	0	0	1.07784	0	0	0	0	0	0.789345	1.58421	0	0	0	0	0	0	1.10898	0	0	0	72652	10090.6	0	0	0	0	0	0
MIDO 826	600	17.5	7.69	95.8	2.6	Escherichia coli	AmpFazFotFoxPodTazAxoCepGen		blaKPC, blaTEM	+	-	-	-	E. hirae	Lin	0	26.8403	0	0	0	0	0	55.2495	0	0	0	0	0.422255	2.78836	0	0	0	0	0	6.19726	0	0	2.89282	0	0	0	278372	30257.8	125.445	13.6353	0.000450638	0	0	0
						Klebsiella oxytoca	AmpFazFotPodTazAxoCepCipP/T4		blaKPC, blaTEM
						Klebsiella pneumoniae	AmpFazCepImi	CRE	blaCTX-M, blaKPC, blaSHV
						Klebsiella pneumoniae	AmpFazPodTazAxoCepCip	ESBL	blaKPC, blaSHV, blaTEM
NORO 108	200	16.2	6.86	65	3.2					+	-	+	-	E. casseliflavus	Lin	5.42217	0	0.0799648	0	0	0	0	0	0	0	0	0	0	0	4.21743	0	0	0	0	0	0	5.06589	1.60344	0	1.30923	0	30154.7	2956.34	0	0	0	0	0	0
NORO 114	100	15.9	7.38	79.8	15					+	-	+	SulTet (2)	E. faecalis	Lin	0	66.8726	0.39458	750.47	0	19.7508	7.57918	13.6318	0	0	0	0	1.86998	0	0	0	0	0	0	27.2015	16.803	46.4727	11.1196	33.9692	5.74421	0	409007	65968.8	0	0	0	0	0	0
NORO 401	350	17.3	6.8	55.3	26					+	-	+	-	E. faecalis	Lin	8.24413	7.50618	31.8659	0	0	13.9143	14.8643	0	10.2243	0	11.9585	21.7162	13.6866	220.682	10.0691	13.6767	0	6.42038	29.0269	13.2962	0	0	16.5613	29.6313	0	0	1.34353e+06	258370	0	0	0	0	0	0
NORO 404	0									+	-	-	-	E. casseliflavus	Lin	4.49926	14.8038	0.262061	0	524.312	7.17031	2.42229	0	0	0	0	0	1.76718	0	23.9345	0	0	12.386	0	0	0	28.3376	11.0015	0	0	0	1.74315e+06	242104	0	0	0	0	0	0
NORO 501	450	14.7	6.98	65.7	11	Serratia fonticola	AmpFazPodCepImi	CRE	blaCTX-M	+	-	+	-	E. faecalis	Lin																											575.59	79.9431	0	0	0	0	0	0
NORO 503	250	15.5	6.98	68.7	9.8	Serratia fonticola	AmpFazCep		blaCTX-M	+	-	-	-	E. faecalis	Lin	0	0	0.684869	0	0	0	0	96.0653	0	0	0	0	2.44033	2.93166	0	0	0	0	0	11.2591	0	0	4.79998	4.19116	0	0
NORO 510	200	16.6	6.93	70.2	16	Serratia fonticola	AmpFazPodCep		blaCTX-M	+	Tet	-	-	E. casseliflavus	Lin	0	0	0	0	0	0	9.43448	0	0	0	0	0	2.15071	0	0	0	0	0	0	0	14.1463	0	9.67976	0	0	0
NORO 511	200	15.5	6.89	62.2	6.8	Serratia fonticola	AmpFazCep		blaCTX-M	+	-	-	-	E. faecalis	Lin	6.23999	0	0.242069	180.961	0	8.42015	0	0	1.98798	0	0	48.4707	0.847617	0	1.91713	0	0	9.07991	0	0	3.86773	0	3.81047	0	1.00538	0
						Serratia fonticola	AmpFazPodCep		blaCTX-M
NORO 514	100	15.8	7.66	65.3	8.6	Serratia fonticola	AmpFazCepImi	CRE	blaCTX-M	+	-	+	-	E. casseliflavus	Lin	5.60742	3.79681	0	119.571	0	1.68079	0	0	0.852613	0	0	0	0	0	0.95077	0	0	11.3778	0	0	0	0	2.46735	35.9669	8.31915	0	279221	45035.7	0	0	0	0	0	0
						Serratia fonticola	AmpFazPodCep		blaCTX-M
NORO 520	200	17.5	7.02	144.8	4.4	Escherichia coli	AmpFazFotPodAxoCep	ESBL	blaCTX-M	+	-	+	-	E. faecalis	CipLinTet	0	0	0.205644	0	0	0	7.94116	0	0	0	0	0	1.08558	0	13.1352	0	186.214	0	0	16.8918	2.29864	0	4.19232	27.7888	0.38131	0	39225.2	2762.33	0	0	0	0	0	0
NORO 527	100	17.9	6.61	134.3	4.6	Escherichia coli	AmpFazFotPodAxoCepCipGen	ESBL	blaCTX-M, blaTEM	+	-	+	-	E. hirae	DapLin	0	1.10392	0	0	0	5.7802	0	0	0	0	0	10.7196	0.593494	0	3.73127	0	31.7645	7.3515	0	0	0	0	2.64769	18.2264	2.00591	0
NORO 605	250	14.8	7.68	62.9	3.5	Serratia fonticola	AmpFazCep		blaCTX-M	+	-	-	-	E. hirae	DapLin	6.382	0	0	0	0	0	0	0	0.266739	0	0	0	1.37162	5.53038	7.88889	0	0	19.7217	0	6.21432	0	0	7.43841	44.7666	10.6069	0	25971.5	1285.72	0	0	0	0	0	0
NORO 609		17.3	6.83	78.8	19	Serratia fonticola	AmpFazFoxPodAxoCep		blaCTX-M
						Serratia fonticola	AmpFazFoxCep		blaCTX-M
NORO 615	500	16.9	7.07	191.9	0.7	Serratia fonticola	AmpFazCep		blaCTX-M	+	Amo/ClaAmpFoxTioAxoStrTet	+	-	E. casseliflavus	Lin	0	0	0	0	16.0499	0	2.68571	0	0.162253	0	0	7.85438	0	1.32655	3.65636	0	0	6.68083	0	0	0	0	1.87183	10.7004	1.44835	0	23294	1153.17	0	0	0	0	0	0
MIDO influent	850000					Kluyvera ascorbata	AmpFazFoxPodCep		blaCTX-M	+	-	+	StrTet (1)	E. mundtii	CipLinPenStrTet	0	0	0	0	0	0	67.1301	0	0	0	0	0	0	0	0	147.962	0	99.7462	231.994	85.7614	0	174.791	168.916	139.108	0	0	3.47146e+07	7.88967e+06	76442.5	17373.3	0.00220203	1257.07	285.698	3.62116e-05
MIDO effluent	0					Klebsiella pneumoniae	AmpFazPodTazAxoCep	ESBL	blaSHV	+	-	-	-	E. hirae	Lin	2.13995	40.7385	23.8858	0	0	0	45.4222	0	74.6169	0	0	0	2.40216	0	41.9748	4.04794	0	29.0918	362.309	37.658	0	46.1576	128.019	252.401	0	262.791
						Klebsiella pneumoniae	AmpFazPodTazAxoCepGen	ESBL	blaCTX-M, blaSHV
NORO influent	600000					Escherichia coli	AmpFazFotPodAxoCep	ESBL	blaCTX-M	+	-	+	StrTet (1)	Ent species	Lin	6.93326	95.5855	0.295152	0	0	14.719	61.0449	0	0	0	0	58.9923	0	0	0	1.45583	0	0	17.0516	0	256.727	0	3.10233	490.001	0	0	116983400	4.87431e+07	237440	98933.2	0.00202969	7727.58	3219.82	6.6057e-05
NORO effluent	0					Citrobacter braakii/freundii	FazFoxCep		blaCTX-M, blaSHV	+	-	-	-	E. mundtii	Lin	0	216.95	22.0886	0	0	0	8.92822	0	32.0765	0	0	0	3.39463	11.7592	0	1.35111	0	0	102.619	0	120.42	0	2.48036	32.4146	3.55666	0
Cedar influent	350000					Kluyvera cryocrescens	AmpFazPodTazAxoCep	ESBL	blaSHV	+	-	+	-	E. faecalis	Lin	0	0	19.8601	0	0	0	0	0	0	0	0	0	1.90004	4.32479	7.47153	0	0	18.9707	208.662	9.13893	0	288.385	132.094	0	3.57536	254.782	3.15608e+07	1.21388e+07	57691.7	22189.1	0.00182796	373.512	143.658	1.18347e-05
						Kluyvera cryocrescens	AmpFazPodTazCep	ESBL	blaSHV
Cedar effluent	0					Klebsiella pneumoniae	Amp		blaSHV	+	Amp	-	-	E. avium	LinStrTet	0	96.4067	46.7139	0	0	0	0	0	113.206	0	0	0	4.50132	0	0	0	0	22.049	98.0788	5.19251	0	0	165.826	127.181	12.7536	155.093
Grey box = sample not analyzed or could not be analyzed
Antibiotics: amoxicillin (Amo), amoxicillin/clavulanic acid (Amo/Cla), ampicillin (Amp), azithromycin (Azi), cefazolin (Faz), cefepime (Fep), cefotaxime (Fot), cefotaxime/clavulanic acid (Fot/Cla),
cefoxitin (Fox), cefpodoxime (Pod), ceftazidime (Taz), ceftazidime/clavulanic acid (Taz/Cla), ceftiofur (Tio), ceftriaxone (Axo), cephalothin (Cep), chloramphenicol (Chl), ciprofloxacin (Cip),
daptomycin (Dap), erythromycin (Ery), gentamicin (Gen), imipenem (Imi), kanamycin (Kan), lincomycin (Lin), linezolid (Lnz), meropenem (Mer), methicillin (Met), nalidixic acid (Nal), nitrofurantoin (Nit)
oxacillin (Oxa), penicillin (Pen), piperacillin/tazobactam (P/T4), synercid (Syn), streptomycin (Str), sulfamethoxazole (Smx), sulfisoxazole (Sul), tetracycline (Tet), tigecycline (Tig), trimethoprim (Tri),
trimethoprim/sulfamethoxazole (Tri/Smx), tylosin (Tyl), and vancomycin (Van).
[truncated: 12 more columns]

## Sheet: S4
Table S4. Masterfile for 2018 Summer Sampling
Sample site	Environmental parameters					ESBL/ CRE				E. coli		Salmonella		Enterococcus		antibiotic concentrations (ng/L)																										gene copies
	E. coli counts (CFU/ml)	temperature (°C)	pH	conductivity (µS/cm)	turbidity (NTU)	organism	AR phenotype	ESBL/CRE	β-lactamase gene	Presence	AR phenotype	Presence	AR phenotype	species	AR phenotype	Amo	Amp	Azi	Axo	Taz	Tio	Cip	Dap	Ery	Gen	Kan	Lin	Lnz	Mer	Met	Nal	Oxa	Pen	Smx	Sul	Str	Tig	Tri	Tet	Tyl	Van	bact16S_copies_uL	bact16S_copies_mL	ermB_copies_uL	ermB_copies_mL	ermB_ratio_to_16S	tetB_copies_uL	tetB_copies_mL	tetB_ratio_to_16S
BICO 101	100	24.8	6.44	81.7	17	Enterobacter cloacae complex	AmpFazFoxCepImi	CRE	blaIMI-NmcA	+	-	+	-	E. faecalis	Lin	31.805	0	0	0	0	0	0	0	0.0679058	0	0	0	0	0	0	0	0	0.347018	1.15579	0	0	0	1.5224	0	0.0596379	0	198436	38160.7	0	0	0	0	0	0
						Escherichia coli	AmpFazFotFoxPodTazAxoCepCip		blaCMY-2, blaSHV, blaTEM
MIDO 103	100	19.6	6.83	42.2	2	Escherichia coli	AmpFazFotPodAxoCep	ESBL	blaCMY-2, blaCTX-M	+	-	+	-	E. casseliflavus	LinSyn	13.7475	0	24.4218	0	0	0	0	0	33.3893	23.6794	24.6108	0.0290126	0	0	0	0	0	0	29.0623	0	0	0	28.1662	0	23.7444	0
						Serratia fonticola	-		blaCTX-M
MIDO 305	800	21.5	6.91	50.8	13					+	-	+	-	E. faecium	CipLinTet																											392274	75437.3	30.6546	5.89511	7.81457e-05	5.25951	1.01144	1.34077e-05
MIDO 604	150		6.9	54.3	8	Serratia fonticola	FazCep		blaCTX-M	+	-	+	-	Ent species	Lin	13.7944	0	0	0	0	0	0	0	23.8755	0	0	0	0	0	0	0	0	0	13.9439	0	0	0	47.6802	0	23.6773	0	48130.2	7762.94	18.2039	2.93611	0.000378221	0	0	0
						Serratia fonticola	AmpFazCep		blaCTX-M
MIDO 605	250	21	6.86	52	7.9	Enterobacter cloacae complex	AmpFazFoxCepImi	CRE	blaIMI-NmcA	+	-	+	-	E. casseliflavus	LinSyn	14.7939	0	26.9167	0	0	12.6957	12.0707	0	41.5497	0	0	0.0611404	24.1119	0	0	0	0	0	36.655	2.09857	0	0	87.5451	0	24.0361	0	65484.2	10562	0	0	0	0	0	0
						Enterobacter cloacae complex	AmpFazFoxCepImiMer	CRE	blaIMI-NmcA
MIDO 606	300	21.4	6.89	50.6	7.6	Serratia fonticola	FazCep		blaCTX-M	+	-	+	-	E. faecalis	Lin	16.6181	4.23794	23.7556	0	0	0	0	0	23.9218	23.6776	0	0	0	0	21.4593	0	0	23.827	15.5581	0	0	0	27.5935	0	23.7093	0	190791	30772.7	0	0	0	0	0	0
MIDO 608	1150	22.2	6.89	54.5	7.7	Enterobacter cloacae complex	AmpFazFoxCepImiMer	CRE	blaIMI-NmcA	+	-	+	-	E. casseliflavus	Lin	2.52006	0	0	0	0	0	0	0.987676	0.00408333	0	0	0	0.00178553	0	0	0	0	0	0	0.0322244	0	0	0.428483	0	0.138565	0	65704.6	9125.64	0	0	0	0	0	0
						Serratia fonticola	FazCep		blaCTX-M
MIDO 609	200	20.5	6.8	60.6	4	Serratia fonticola	AmpFazPodCep		blaCTX-M	+	-	-	-	Ent species	Lin	8.53192	4.61798	0	0	0	0	0.141412	0	0	0	0	0	0.107034	2.83947	0	0	0	0	0	0.0153272	0	0	0.0815017	0	0.110553	0	466111	75179.1	0	0	0	0	0	0
						Serratia fonticola	FazCep		blaCTX-M
MIDO 610	100	22	6.92	54.9	8.4	Enterobacter cloacae complex	AmpFazFoxCepImi	CRE	blaIMI-NmcA	+	-	+	-	E. casseliflavus	Lin	0	0	0	0	0	0	0	0	0.00472409	0	0	0	0	0	0	0	0	0.154765	0.176501	0.0434126	0	0	0.731822	0	0.0292767	0	161161	25993.7	0	0	0	0	0	0
						Serratia fonticola	FazCep		blaCTX-M
						Serratia fonticola	AmpFazCep		blaCTX-M
MIDO 611	150	21.1	6.9	56.7	8.9					+	-	+	-	E. casseliflavus	Lin	13.9559	4.35057	0	0	0	11.5899	0	0	23.7694	0	0	0	24.1345	9.91608	0	0	0	23.13	15.3268	0	0	0	31.8629	0	23.7742	0	187015	30163.7	0	0	0	0	0	0
MIDO 612	100	22.5	6.91	55.6	7.3	Serratia fonticola	FazCep		blaCTX-M	+	-	+	-	E. faecalis	LinTet	3.44995	0	0	1.00198	0	0	0	0	0.00962838	0	0	0	0.00117579	0	0	0	0	0	0.62867	0.106356	0	0	0.78435	0	0.0694733	0	318487	34618.2	29.1517	3.16866	9.15318e-05	0	0	0
MIDO 613	350	21.9	6.78	57.1	9.6	Serratia fonticola	FazCep		blaCTX-M	+	-	+	-	E. faecalis	Lin	2.55696	0	0	0	0	0.976758	0	0	0	0	0	0	0	0	0	0	0	0	0	0	0	0	0.124446	0	0.225453	0	176771	28511.4	0	0	0	0	0	0
MIDO 616	100	21.4	6.77	71.6	1.8	Serratia fonticola	FazCep		blaCTX-M	+	-	+	-	E. casseliflavus	Lin	0	0	23.7441	0	0	0	0	0	27.066	0	0	0	23.9619	0	0	0	0	0	19.9532	0	0	0	29.4834	0	23.7117	0
MIDO 617	600	20.9	6.84	54.5	14	Serratia fonticola	AmpFazCepImi	CRE	blaCTX-M	+	-	+	-	E. casseliflavus	Lin	6.8141	1.5958	0	8.60627	0	0	0.101388	2.02817	0.0211035	0	0	0	0	0	0.129789	0	0	0.245021	0.317903	0	0	0	0.0409767	0	0.159735	0	99955.1	16121.8	0	0	0	0	0	0
MIDO 706	550	23.4	6.61	42.4	8.5	Serratia fonticola	FazCep		blaCTX-M	+	-	+	-	E. faecalis	Lin	22.3929	0	0	4.0459	0	0	0	1.15471	0	0	0	0	0	0	0	0	0	0.279834	0.132507	0.0278353	0	0	0.0960377	0	0.0514188	0	81187.1	15612.9	0	0	0	0	0	0
						Serratia fonticola	AmpFazPodAxoCepImi	CRE	blaCTX-M
MIDO 707	600	22.6	7.3	271.1	8.5	Serratia fonticola	AmpFazCep		blaCTX-M	+	-	+	-	E. casseliflavus	CipLin	37.51	0.622589	0	0	0	0.731897	0	0	0.0532946	0	0	0	0.00388746	0	0.353118	0	0	0	0.842788	0	0	0	0.65073	0	0.148099	0	35583	5739.19	0	0	0	0	0	0
MIDO 709	550	20	6.63	60.4	4.9	Serratia fonticola	FazCep		blaCTX-M	+	-	+	-	E. faecalis	Lin	29.1082	0	24.4434	0	0	0	13.6263	0	29.1412	0	0	0	24.0068	0	0	0	0	0	25.483	2.52486	0	0	32.4546	0	23.7076	0	81163.6	8822.13	0	0	0	0	0	0
MIDO 712	200	25.5	7.03	74.4	3.2					+	-	+	-	E. faecalis	CipLin	28.0108	0	23.9311	0	23.7925	0	12.1244	0	27.4046	0	0	0	0	0	0	0	0	23.2877	98.4461	0	0	0	32.851	0	23.7237	0	105140	9387.54	0	0	0	0	0	0
MIDO 719	0	24.5	6.47	76.6	23	Escherichia coli	AmpFazFotPodAxoCep	ESBL	blaCMY-2, blaCTX-M	+	-	+	-	E. casseliflavus	Lin																											406069	49520.6	0	0	0	0	0	0
MIDO 801	150	24.3	6.98	87.7	20	Serratia fonticola	AmpFazCep		blaCTX-M	+	-	+	-	E. casseliflavus	Lin	14.572	0	24.4133	0	0	0	0	0	24.2488	23.6495	0	0	0	0	21.6286	39.8666	0	0	23.6765	0	0	0	45.5909	0	0	0	146846	23684.8	0	0	0	0	0	0
MIDO 802	250	21.1	6.96	77.8	2.4	Klebsiella pneumoniae	AmpFazFotPodAxoCepGen	ESBL	blaCTX-M, blaOXA-1, blaSHV, blaTEM	+	-	+	-	E. faecalis	LinTet	0	0	0	0	0	0.75506	0	1.96989	0	0	0	0	0	0	0	0	0	2.19736	1.40553	0	0	0	0.0760394	0	1.03386	0	208853	17119.1	0	0	0	0	0	0
						Serratia fonticola	FazCep		blaCTX-M
MIDO 804	300	20.8	6.9	69.4	0.4	Serratia fonticola	AmpFazCep		blaCTX-M	+	-	+	-	E. faecalis	Lin	18.337	0	0	0	23.8154	0	0	0	24.55	0	0	0	25.2747	0	0	0	0	0	0	0	0	0	46.9361	0	0	0	1.55621e+06	73406.2	34.6035	1.63224	2.22357e-05	0	0	0
						Serratia fonticola	FazCep		blaCTX-M
MIDO 805	150	21.8	6.82	73.6	7.1					+	-	+	-	E. faecalis	Lin	14.015	0	23.8413	0	0	0	0	0	0	0	0	0	0	9.91905	0	0	0	23.0436	16.4154	0	0	0	25.3935	0	23.7463	0	121057	23280.2	0	0	0	0	0	0
MIDO 816	200	20.9	6.91	60	1.7					+	-	+	-	E. casseliflavus	CipLin	0	0	0	0	0	0	0.0191379	0.302043	0.00372707	0	0	0	0	0	0.0652767	0	0	0	0.351194	0	0	0	0.229014	0	0.0368257	0	103582	11258.9	0	0	0	0	0	0
MIDO 817	150	20.8	6.93	53.9	1.4	Serratia fonticola	AmpFazAxoCep		blaCTX-M	+	-	+	-	E. casseliflavus	Lin																											2828.07	277.261	0	0	0	0	0	0
MIDO 820	150		6.94	47.1	2.6	Serratia fonticola	FazCep		blaCTX-M	+	-	+	-	E. casseliflavus	CipLin	0	0	0	0	0	0.215491	0	0	0	0	0	0	0.00323678	5.65462	0.0691629	0.0932007	0	0.11902	0.208571	0	0	0	0.133306	0	0.0711682	0	49994	4463.75	0	0	0	0	0	0
MIDO 825	250	20.5	6.56	64.9	4.8	Serratia fonticola	AmpFazCep		blaCTX-M	+	-	-	-	E. faecalis	Lin	18.2283	0	0	0	0	11.1585	12.4825	0	23.96	0	0	0	0	0	0	0	0	0	14.9969	2.21657	0	0	26.8318	0	23.709	0	10236.5	1248.35	0	0	0	0	0	0
MIDO 826	150	20.8	6.53	71.9	1.7	Serratia fonticola	AmpFazCep		blaCTX-M	+	Amo/ClaAmpFoxTioAxo	+	-	E. faecalis	Lin	39.942	0	0	0	0	0	0	0	24.6092	0	0	0	25.0707	0	0	0	0	0	0	2.82113	0	0	33.5536	0	23.7066	0	176.915	21.575	0	0	0	0	0	0
NORO 108	3500	21.6	6.89	61.6	2.2	Escherichia coli	AmpFazFotPodAxoCepCip	ESBL	blaCTX-M	+	-	+	-	Ent species	Lin																											95623.4	13281	2502.11	347.516	0.0261663	7.43762	1.033	7.77803e-05
						Serratia fonticola	AmpFazCep		blaCTX-M
NORO 114	450	23.7	6.88	68	20	Serratia fonticola	FazCep		blaCTX-M	+	-	+	-	E. casseliflavus	CipLin	16.0965	0	0	0	23.7425	0	0	0	23.7764	0	24.31	0	26.0637	0	20.8856	0	0	23.3229	16.72	0	0	0	84.2971	0	0	0	282714	54368	0	0	0	0	0	0
NORO 401	150	26.4	6.78	55.4	18	Serratia fonticola	AmpFazCep		blaCTX-M	+	-	+	-	E. faecalis	Lin	2.98681	0	0	2.80353	0	0.35781	0.0917229	0	0	0	0	0	0.00486068	0	0	0	0	0	0	0.0150215	0	0	0.131608	0	0.0721618	0	591200	72097.5	0	0	0	0	0	0
						Serratia fonticola	AmpFazPodCep		blaCTX-M
NORO 404	0		7.2	54.1	3.4					+	-	+	-	E. casseliflavus	Lin	0	0	0	1.40096	0	1.45154	0	2.8753	0	0	0	0	0.00353574	0	0	0	0	0	0	0.0583596	0	0	0.164973	0	0.110219	0	3.59224e+06	352180	0	0	0	0	0	0
NORO 501	300	21.5	6.83	63.6	11	Serratia fonticola	AmpFazCep		blaCTX-M	+	-	+	-	E. faecalis	Lin	20.1095	0	0	0	0	0	12.7308	0	23.9163	23.6582	0	0	0	0	0	0	0	0	17.4702	2.38696	0	0	37.1704	0	23.7287	0	221531	35730.9	0	0	0	0	0	0
						Serratia fonticola	FazCep		blaCTX-M
NORO 502	250	20.9	6.64	132	5.2					+	-	+	-	E. faecalis	Lin																											30781.7	2331.94	0	0	0	0	0	0
NORO 503	800	22.3	6.63	64.3	12					+	Nal	+	-	E. casseliflavus	LinTet	11.1006	0	0	0	0	0	0	0	0.00411023	0	0	0	0	0	0.0975799	0	0	0	0.308734	0.0771041	0	0	0.0924414	0	0.0580786	0	135885	21916.9	399.272	64.3988	0.00293831	0	0	0
NORO 510	150	24.5	6.59	65.2	22					+	-	+	-	E. faecalis	Lin	19.9838	0	0	0	0	0	0.110668	0	0	0	0	0.0189389	0	0	0	0	0	0	0.101982	0	0	0	0.020191	0	0.289822	0	244259	46972.9	0	0	0	0	0	0
NORO 514	200	22.4	6.76	58.5	12	Serratia fonticola	FazCep		blaCTX-M	+	-	+	-	E. casseliflavus	Cip	2.53348	1.6306	0	0	0	0	0	0	0.00890545	0	0	0	0.00249828	0	0.355967	0	0	0	0.78407	0	0	0	0.316319	0	0.118939	0	76002.9	10556	0	0	0	0	0	0
						Serratia fonticola	AmpFazPodCep		blaCTX-M
NORO 517	350	23.1	6.6	161	3					+	-	+	-	E. casseliflavus	Lin	13.4811	0	0	0	0	0	0	0	24.3673	0	0	0	0	0	0	0	0	0	19.131	2.7847	0	0	32.5805	0	23.74	0
NORO 518	250	21.8	6.55	263	3.6	Serratia fonticola	AmpFazPodCep		blaCTX-M	+	-	-	-	E. casseliflavus	Lin	18.7741	4.24199	26.9328	0	0	0	0	0	66.5442	23.7276	0	0	27.3072	0	0	81.7624	0	23.4687	48.3014	0	0	0	27.9491	0	24.4836	0
						Serratia fonticola	AmpFazCep		blaCTX-M
NORO 520	650	22.8	6.6	115.7	4.6	Enterobacter cloacae complex	AmpFazFoxCepImiMer	CRE	blaIMI-NmcA	+	-	+	-	E. faecalis	Lin	2.23763	0	0	2.62398	0	0	0.253826	1.62215	0.00719894	0	0	0	0.00458717	0	0	0	0	0	0.231887	0.0740392	0	0	0.407449	0	0	0	242169	26322.7	160.72	17.4695	0.000663669	0	0	0
						Serratia fonticola	AmpFazCep		blaCTX-M
NORO 527	200	22.3	6.54	113.1	3.6	Enterobacter cloacae complex	AmpFazFoxCepImiMer	CRE	blaIMI-NmcA	+	-	+	-	E. faecalis	Lin	18.4687	0	23.8038	0	0	0	0	0	24.3503	0	0	0	24.3771	0	0	0	0	0	19.0365	2.24026	0	0	38.4659	0	23.7185	0	339097	36858.4	201.548	21.9074	0.000594368	0	0	0
NORO 605	200	24.8	6.58	74.8	15	Serratia fonticola	AmpFazPodCep		blaCTX-M	+	-	+	-	E. avium	Lin	0	3.92339	0	0	0	0	0	0	0.00711426	0	0	0	0.00207248	0	0.442504	0	0	0	0.848942	0	0	0	0.969678	0.178101	0.0640894	0	1.26354e+06	203797	28.8681	4.65614	2.2847e-05	0	0	0
NORO 609	200	25.1	6.57	74.7	16	Serratia fonticola	FazCep		blaCTX-M	+	-	+	-	E. casseliflavus	Lin	13.8237	0	0	0	0	0	0	0	0.0162876	0	0	0.0276256	0.00542585	0	0.351583	0	0	0	0.543676	0.035685	0	0	3.38153	0	0.0608245	0	631897	77060.6	10.4789	1.27791	1.65832e-05	0	0	0
NORO 615	250	23.2	6.39	176.5	0					+	-	+	-	E. faecalis	Lin	0	0	0	0	0	0	11.8722	0	23.7179	0	24.8727	0	0	0	21.0616	55.2174	0	0	15.2814	0	0	0	26.9595	0	23.7272	0	956263	116617	34.9268	4.25937	3.65243e-05	0	0	0
MIDO influent	2950000					Enterobacter asburiae	AmpFazFoxPodCep		blaKPC	+	-	+	-	Ent species	Lin	0	0	0	0	31.0457	25.7371	0	0	0	0	0	0	34.1099	0	0	93.2592	0	0	884.979	0	0	0	556.981	0	24.293	0
						Escherichia coli	AmpFazFotPodTazAxoCepCip	ESBL	blaCTX-M, blaOXA-1
						Klebsiella pneumoniae	AmpFazPodAxoCep		blaKPC
MIDO effluent	0					Enterobacter cloacae complex	AmpFazFotFoxPodAxoCepCipImiP/T4	CRE	blaKPC	+	-	-	-	E. casseliflavus	CipLin	0	0	261.145	0	25.2515	0	0	0	3550.59	0	75.6928	0	44.2948	0	0	328.506	0	0	2193.48	0	0	0	44.322	20.932	113.183	0
						Klebsiella pneumoniae	AmpFazPodCepCip		blaKPC
NORO influent	650000					Enterobacter cloacae complex	AmpFazFotFoxPodTazAxoCep		blaKPC	+	-	+	-	Ent species	Lin	0	0	0	0	0	0	0	0	0	23.7894	30.9326	0	36.7963	0	28.192	61.4091	0	0	345.803	19.0479	0	0	916.022	0	29.3483	0
						Escherichia coli	AmpFazFepFotPodTazAxoCepCip	ESBL	blaCTX-M
						Klebsiella pneumoniae	AmpFazFotPodTazAxoCepP/T4		blaKPC
						Kluyvera cryocrescens	Faz		blaCTX-M
NORO effluent	0					Enterobacter cloacae complex	AmpFazFoxCepImiMer	CRE	blaIMI-NmcA	+	AmpGenStrSulTetTri/Smx	-	-	-	-	43.5649	0	141.749	0	0	13.0755	23.4726	0	355.741	0	32.0262	0	55.0882	0	0	199.628	0	0	409.687	0	0	0	41.8568	0	27.8892	0
Cedar influent	2100000					Escherichia coli	AmpFazFotPodAxoCepCip	ESBL	blaCTX-M, blaOXA-1	+	-	+	-	E. faecalis	Lin	0	0	0	0	0	0	0	19.111	0	0	0	0	0.491314	31.7534	0	0	0	0	284.678	0	0	0	31.6038	1.55237	2.70066	0
						Klebsiella pneumoniae	AmpFazFotPodTazAxoCepGen	ESBL	blaSHV
Cedar effluent	0									-	-	+	-	E. faecium	DapLinTet	21.6003	4.27285	326.459	0	0	0	29.7215	0	1965.9	0	0	0	69.1783	0	0	0	0	0	1338.92	0	0	0	5776.99	0	134.028	0
Grey box = sample not analyzed or could not be analyzed
Antibiotics: amoxicillin (Amo), amoxicillin/clavulanic acid (Amo/Cla), ampicillin (Amp), azithromycin (Azi), cefazolin (Faz), cefepime (Fep), cefotaxime (Fot), cefotaxime/clavulanic acid (Fot/Cla),
cefoxitin (Fox), cefpodoxime (Pod), ceftazidime (Taz), ceftazidime/clavulanic acid (Taz/Cla), ceftiofur (Tio), ceftriaxone (Axo), cephalothin (Cep), chloramphenicol (Chl), ciprofloxacin (Cip),
daptomycin (Dap), erythromycin (Ery), gentamicin (Gen), imipenem (Imi), kanamycin (Kan), lincomycin (Lin), linezolid (Lnz), meropenem (Mer), methicillin (Met), nalidixic acid (Nal), nitrofurantoin (Nit)
oxacillin (Oxa), penicillin (Pen), piperacillin/tazobactam (P/T4), synercid (Syn), streptomycin (Str), sulfamethoxazole (Smx), sulfisoxazole (Sul), tetracycline (Tet), tigecycline (Tig), trimethoprim (Tri),
trimethoprim/sulfamethoxazole (Tri/Smx), tylosin (Tyl), and vancomycin (Van).
[truncated: 12 more columns]

## Sheet: S5
Table S5. β-lactamase gene patterns in ESBL and CRE isolates recovered from surface water and wastewater
	Organism (no. of isolates)	Gene patterns (no. of isolates with the same pattern)
ESBL	Escherichia coli (n = 14)	blaCTX-M (4), blaCMY-2, blaCTX-M (2), blaCTX-M, blaOXA-1 (2),
		blaCTX-M, blaTEM (5), blaCMY-2, blaCTX-M, blaTEM (1)
	Klebsiella pneumoniae (n = 6)	blaKPC (1), blaSHV (2), blaCTX-M, blaSHV (1), blaKPC, blaSHV, blaTEM (1),
		blaCTX-M, blaOXA-1, blaSHV, blaTEM (1)
	Kluyvera cryocrescens (n = 2)	blaSHV (2)
	Serratia fonticola (n = 20)	blaCTX-M (20)
CRE	Enterobacter spp. (n = 1)	blaSHV (1)
	Enterobacter asburiae (n = 1)	blaKPC (1)
	Enterobacter cloacae complex (n = 9)	blaIMI-NmcA (8), blaKPC (1)
	Klebsiella pneumoniae (n = 1)	blaCTX-M, blaKPC, blaSHV (1)
	Serratia fonticola (n = 6)	blaCTX-M (6)

## Sheet: S6
Table S6. Seasonal contrasts for the presence of (a) ESBL- and (b) β-lactamase-producing bacteria in surface water
(a)	contrast	estimate	99% CI	95% CI	90% CI	66% CI
	fall - winter	0.0454	(0.00129, 0.924)	(0.0027, 0.493)	(0.00409, 0.367)	(0.0123, 0.149)
	fall - spring	0.0518	(0.00172, 1.64)	(0.00404, 0.635)	(0.00565, 0.425)	(0.0145, 0.178)
	fall - summer	0.349	(0.00183, 56.5)	(0.00831, 17.2)	(0.0143, 9.28)	(0.0546, 2.18)
	winter - spring	1.17	(0.0123, 153)	(0.0311, 46.3)	(0.0531, 25.6)	(0.192, 6.82)
	winter - summer	8.43	(0.0136, 7490)	(0.0491, 1320)	(0.103, 621)	(0.692, 93.4)
	spring - summer	6.77	(0.0943, 553)	(0.282, 205)	(0.476, 112)	(1.42, 33.4)
(b)	contrast	estimate	99% CI	95% CI	90% CI	66% CI
	fall - spring	0.0281	(0.00204, 0.332)	(0.00431, 0.173)	(0.00588, 0.134)	(0.0112, 0.071)
	fall - summer	0.0067	(0.000139, 0.381)	(0.000316, 0.116)	(0.000497, 0.0769)	(0.00147, 0.028)
	fall - winter	0.115	(0.00863, 1.12)	(0.0166, 0.641)	(0.0223, 0.501)	(0.0452, 0.272)
	spring - summer	0.233	(0.0167, 3.21)	(0.0286, 1.79)	(0.0416, 1.28)	(0.0843, 0.655)
	winter - spring	0.26	(0.00682, 10.8)	(0.0161, 3.81)	(0.0249, 2.4)	(0.0669, 0.903)
	winter - summer	0.0596	(0.000336, 15.2)	(0.00102, 2.79)	(0.00194, 1.35)	(0.00838, 0.418)

## Sheet: S7
Table S7. Estimated (a) absolute and (b) relative ARG copy numbers in wastewater influent and effluent
(a)	gene	source type	estimate	99% CI	95% CI	90% CI	66% CI
	mean	influent	27000	(4470, 129000)	(8400, 80700)	(10600, 66000)	(16300, 44200)
	mean	effluent	501	(38.3, 6110)	(76.5, 3290)	(105, 2360)	(212, 1270)
	blaCTX-M	influent	5210	(763, 28100)	(1430, 18000)	(1820, 14900)	(2850, 9470)
	blaCTX-M	effluent	156	(9.2, 2820)	(17.9, 1380)	(26.2, 1010)	(55.6, 464)
	blaKPC	influent	97700	(15900, 624000)	(25600, 378000)	(33300, 292000)	(53300, 179000)
	blaKPC	effluent	1520	(109, 21200)	(198, 11500)	(276, 7730)	(576, 3930)
	blaSHV	influent	14500	(2060, 84700)	(3910, 51900)	(5150, 41300)	(8270, 26100)
	blaSHV	effluent	196	(12.1, 2850)	(25.5, 1360)	(36.4, 1050)	(74.6, 532)
	ermB	influent	93400	(14900, 533000)	(26900, 349000)	(34200, 266000)	(53100, 172000)
	ermB	effluent	1540	(116, 23300)	(214, 12000)	(284, 8570)	(591, 4250)
	qnrS	influent	238000	(34300, 1560000)	(65200, 871000)	(83300, 684000)	(130000, 429000)
	qnrS	effluent	8490	(628, 124000)	(1090, 63800)	(1490, 45900)	(3220, 21900)
	tetB	influent	2190	(327, 12100)	(586, 8190)	(795, 6460)	(1240, 4070)
	tetB	effluent	27.5	(1.61, 451)	(3.48, 222)	(4.92, 159)	(10.5, 77.4)
(b)	gene	source type	estimate	99% CI	95% CI	90% CI	66% CI
	blaCTX-M	influent	0.000189	(6.67e-05, 0.000542)	(9.09e-05, 4e-04)	(0.000102, 0.000349)	(0.000133, 0.000266)
	blaCTX-M	effluent	0.000105	(1.11e-05, 0.00106)	(1.89e-05, 0.000584)	(2.36e-05, 0.000434)	(4.49e-05, 0.000243)
	blaKPC	influent	0.00325	(0.00119, 0.0095)	(0.00156, 0.00683)	(0.00174, 0.00607)	(0.00231, 0.00458)
	blaKPC	effluent	0.00139	(0.000157, 0.012)	(0.000273, 0.00719)	(0.000357, 0.00549)	(0.000638, 0.00295)
	blaSHV	influent	0.000526	(0.000186, 0.00148)	(0.000256, 0.00112)	(0.000291, 0.000968)	(0.000376, 0.00073)
	blaSHV	effluent	0.000197	(2.41e-05, 0.00178)	(3.94e-05, 0.000996)	(5.16e-05, 0.000781)	(9.01e-05, 0.000429)
	ermB	influent	0.00374	(0.00123, 0.0103)	(0.00179, 0.00788)	(0.00208, 0.00688)	(0.0027, 0.00524)
	ermB	effluent	0.000988	(0.000112, 0.00932)	(0.000204, 0.00522)	(0.000261, 0.00384)	(0.000454, 0.00217)
	qnrS	influent	0.00898	(0.00291, 0.025)	(0.00431, 0.0191)	(0.00497, 0.0166)	(0.00638, 0.0127)
	qnrS	effluent	0.00556	(0.000612, 0.0471)	(0.0011, 0.0281)	(0.00148, 0.0218)	(0.00259, 0.0122)
	tetB	influent	8.33e-05	(2.94e-05, 0.000235)	(3.92e-05, 0.000175)	(4.52e-05, 0.000153)	(5.89e-05, 0.000118)
	tetB	effluent	1.88e-05	(2.09e-06, 0.000171)	(3.69e-06, 9.74e-05)	(4.92e-06, 7.76e-05)	(8.6e-06, 4.09e-05)

## Sheet: S8
Table S8. Estimated antibiotic concentrations in wastewater influent and effluent
antibiotic	source type	estimate	99% CI	95% CI	90% CI	66% CI
mean	influent	72.6	(44.1, 134)	(49.6, 114)	(52.3, 106)	(60, 89.3)
mean	effluent	35.7	(19.4, 66.7)	(23.1, 56)	(24.9, 52.1)	(29.1, 44.4)
Amoxicillin	influent	58.9	(8.88, 402)	(13.5, 246)	(16.8, 198)	(28.6, 121)
Amoxicillin	effluent	35.7	(11.6, 122)	(15.3, 88.2)	(17.3, 76.6)	(23.6, 54.2)
Ampicillin	influent	74.7	(17.8, 694)	(22.9, 387)	(27.4, 293)	(40.6, 155)
Ampicillin	effluent	58.7	(17.9, 289)	(22.8, 180)	(26.1, 151)	(36.3, 100)
Azithromycin	influent	74.3	(17.7, 626)	(24.3, 322)	(28.4, 242)	(41.6, 148)
Azithromycin	effluent	33.5	(13.7, 105)	(16.9, 77)	(18.7, 67.5)	(23.3, 49.6)
Ceftriaxone	influent	83.5	(5.27, 19800)	(8.67, 3530)	(11.4, 1780)	(24.1, 400)
Ceftriaxone	effluent	42.4	(0.127, 14900)	(0.526, 4620)	(1.17, 1960)	(5.1, 376)
Ceftazidime	influent	507	(83.8, 9010)	(126, 3530)	(149, 2450)	(247, 1190)
Ceftazidime	effluent	17	(0.612, 2580)	(1.17, 691)	(1.72, 418)	(4, 99.5)
Ceftiofur	influent	39.8	(12.3, 207)	(15.3, 130)	(17.6, 104)	(24.3, 69.1)
Ceftiofur	effluent	2.66	(0.291, 161)	(0.43, 43.2)	(0.544, 26.5)	(0.97, 9.33)
Ciprofloxacin	influent	99.8	(24.3, 721)	(33.4, 428)	(39.1, 338)	(55.9, 193)
Ciprofloxacin	effluent	67.8	(22.6, 280)	(29.4, 192)	(33.3, 160)	(43.6, 109)
Daptomycin	influent	679	(93.3, 10400)	(148, 4820)	(189, 3400)	(312, 1680)
Daptomycin	effluent	112	(9.15, 5140)	(15, 2150)	(19.7, 1330)	(37.6, 421)
Erythromycin	influent	31.7	(3.85, 1300)	(6.01, 427)	(7.79, 248)	(13.6, 97.8)
Erythromycin	effluent	115	(45.9, 347)	(56.1, 264)	(63.8, 228)	(80.3, 170)
Gentamicin	influent	193	(17.1, 7020)	(28.8, 2630)	(38.7, 1430)	(70.4, 579)
Gentamicin	effluent	249	(31.1, 8560)	(44.4, 2840)	(56.6, 1770)	(98.5, 773)
Kanamycin	influent	8.77	(1.18, 339)	(1.68, 111)	(2.14, 71.4)	(3.65, 26.4)
Kanamycin	effluent	8.12	(1.08, 213)	(1.62, 91.5)	(2.05, 57.4)	(3.45, 23.3)
Lincomycin	influent	10.7	(3.03, 60.7)	(3.95, 36.8)	(4.62, 28.9)	(6.52, 18.4)
Lincomycin	effluent	1.31	(0.303, 13)	(0.401, 7.66)	(0.461, 5.66)	(0.676, 2.79)
Linezolid	influent	5.75	(1.41, 36)	(1.87, 21.5)	(2.2, 17.1)	(3.26, 10.6)
Linezolid	effluent	4.23	(1.56, 19.6)	(1.89, 12.4)	(2.12, 10)	(2.81, 6.79)
Meropenem	influent	11.2	(1.5, 385)	(2.21, 148)	(2.79, 93.4)	(4.78, 34.1)
Meropenem	effluent	9.35	(1.25, 250)	(1.85, 90.7)	(2.34, 63.1)	(3.92, 26.2)
Methicillin	influent	13.7	(2.53, 311)	(3.58, 109)	(4.27, 70.3)	(6.59, 31.6)
Methicillin	effluent	19.9	(4.28, 227)	(5.75, 112)	(6.99, 81.1)	(10.5, 43)
Nalidixic acid	influent	42.9	(10.6, 287)	(14.4, 173)	(16.6, 138)	(23.8, 79.2)
Nalidixic acid	effluent	16.5	(4.93, 78.1)	(6.66, 52.2)	(7.69, 42.4)	(10.3, 27.9)
Oxacillin	influent	230	(27.6, 13700)	(43.3, 3410)	(53, 1890)	(93, 691)
Oxacillin	effluent	255	(30.2, 10900)	(44.4, 3620)	(58.1, 2170)	(103, 817)
Penicillin	influent	57	(10, 868)	(14.8, 369)	(17.9, 263)	(28.1, 128)
Penicillin	effluent	19.5	(4.47, 209)	(6, 105)	(7.13, 74.9)	(10.7, 41)
Sulfamethoxazole	influent	147	(57.6, 481)	(69.7, 365)	(77.9, 307)	(101, 224)
Sulfamethoxazole	effluent	137	(56.4, 460)	(68, 319)	(75.5, 276)	(95.9, 204)
Sulfisoxazole	influent	42.1	(9.99, 279)	(14.5, 174)	(16.8, 134)	(24.4, 78.3)
Sulfisoxazole	effluent	15.7	(3.64, 130)	(4.76, 72.2)	(5.73, 54.2)	(8.6, 31.2)
Streptomycin	influent	189	(27.2, 5820)	(37.1, 2130)	(47.2, 1300)	(82.2, 520)
Streptomycin	effluent	106	(18.1, 2940)	(25.4, 1010)	(31.7, 626)	(50.6, 269)
Tigecycline	influent	219	(31.3, 7190)	(46.5, 2480)	(55.8, 1620)	(95.2, 621)
Tigecycline	effluent	55.5	(4.93, 3450)	(6.97, 1290)	(9.16, 782)	(17.9, 226)
Trimethoprim	influent	117	(40.5, 505)	(51.7, 328)	(57.4, 259)	(77, 182)
Trimethoprim	effluent	121	(47.9, 405)	(59.1, 298)	(65.7, 248)	(83.5, 184)
Tetracycline	influent	145	(28.9, 1510)	(41, 777)	(50.7, 562)	(75.4, 294)
Tetracycline	effluent	51.6	(14.3, 256)	(19.9, 176)	(22.9, 146)	(31.9, 90.4)
Tylosin	influent	29.5	(7.93, 143)	(10.5, 96.9)	(12.3, 80.1)	(17.7, 52.8)
Tylosin	effluent	16.2	(5.8, 61.9)	(7.34, 42.1)	(8.28, 36.3)	(11, 25.4)
Vancomycin	influent	351	(26.1, 46500)	(42.3, 12700)	(54.6, 7020)	(107, 1620)
Vancomycin	effluent	179	(29.4, 3730)	(40.8, 1570)	(49.6, 1030)	(82.2, 461)

## Sheet: S9
Table S9. Estimated (a) ARG copy numbers and (b) antibiotic concentration in upstream and downstream water samples
(a)	water samples	estimate	99% CI	95% CI	90% CI	66% CI
	upstream	48.2	(1.18, 1950)	(2.71, 791)	(4.45, 518)	(12.6, 185)
	downstream	70.7	(1.7, 3510)	(4.03, 1360)	(6.76, 731)	(19.7, 265)
	ratio	1.42	(0.0372, 108)	(0.081, 40.2)	(0.128, 20.8)	(0.345, 6.28)
(b)	water samples	estimate	99% CI	95% CI	90% CI	66% CI
	upstream	103	(50.5, 196)	(62.2, 164)	(67.4, 152)	(81.8, 128)
	downstream	67.6	(19.4, 300)	(28, 208)	(32.7, 170)	(44.4, 111)
	ratio	0.673	(0.165, 3.61)	(0.243, 2.21)	(0.292, 1.8)	(0.408, 1.15)

## Sheet: S10 
Table S10. Antibiotics used for MIC determination of bacterial isolates and their breakpoints
Sensititre™ NARMS Gram negative plate (CMV3AGNF)
Antibiotics	Breakpoints (μg/mL)
Amoxicillin/clavulanic acid	≥ 32/16
Ampicillin	≥ 32
Azithromycin	≥ 32
Cefoxitin	≥ 32
Ceftiofur	≥ 8
Ceftriaxone	≥ 4
Chloramphenicol	≥ 32
Ciprofloxacin	≥ 4 (E. coli), ≥ 1 (Salmonella)
Gentamicin	≥ 16
Nalidixic acid	≥ 32
Streptomycin	≥ 64
Sulfisoxazole	≥ 512
Tetracycline	≥ 16
Trimethoprim/sulfamethoxazole	≥ 4/76
Sensititre™ NARMS Gram positive plate (CMV3AGPF)
Antibiotics	Breakpoints (μg/mL)
Chloramphenicol	≥ 32
Ciproﬂoxacin	≥ 4
Daptomycin	≥ 8
Erythromycin	≥ 8
Gentamicin	≥ 500
Kanamycin	≥ 1024
Lincomycin	≥ 8
Linezolid	≥ 8
Nitrofurantoin	≥ 128
Penicillin	≥ 16
Streptomycin	≥ 1000
Synercid (Quinupristin/Dalfopristin)	≥ 4
Tetracycline	≥ 16
Tigecycline	≥ 0.5
Tylosin	≥ 32
Vancomycin	≥ 32
Sensititre™ extended spectrum β-lactamase plate (ESB1F)
Antibiotics	Breakpoints (μg/mL)
Ampicillin	≥ 32
Cefazolin	≥ 8
Cefepime	≥ 16
Cefotaxime	≥ 4
Cefotaxime/clavulanic acid	see belowa
Cefoxitin	≥ 32
Cefpodoxime	≥ 8
Ceftazidime	≥ 16
Ceftazidime/clavulanic acid	see belowa
Ceftriaxone	≥ 4
Cephalothin	≥ 32
Ciprofloxacin	≥ 1
Gentamicin	≥ 16
Imipenem	≥ 4
Meropenem	≥ 4
Piperacillin/tazobactam	≥ 128/4
a ESBL-producers if resistant to Fot and/or Taz and exhibited a ≥ 3-two-fold decrease in MIC of Fot/Cla
compared to Fot alone, and/or a ≥ 3-two-fold decrease in MIC of Taz/Cla compared to Taz alone

[truncated: 1 more sheets: S11]
